# Supplementary material
Source: PubMed Central journal article supplement (PMC3779381)
Supplement: supp_blood-2013-01-478222_blood-2013-01-478222-1.pdf [file supp_blood-2013-01-478222_blood-2013-01-478222-1.pdf]

**Prognostic value of miR-155 in individuals with monoclonal B-cell lymphocytosis and patients with B-chronic lymphocytic leukemia**

*Alessandra Ferrajoli, Tait D. Shanafelt, Cristina Ivan, Masayoshi Shimizu, Kari G. Rabe, Nazila*

*Nourae, Mariko Ikuo, Asish K. Ghosh,*

*Susan Lerner, Laura Z. Rassenti, Lianchun Xiao, Jianhua Hu, James M. Reuben, Steliana Calin, M.*

*James You, John T. Manning,*

*William G. Wierda, Zeev Estrov, Susan O'Brien, Thomas J. Kipps, Michael J. Keating, Neil E. Kay and*

*George A. Calin*

| <b>CONTENT</b>                      | <b>pages</b>   |
|-------------------------------------|----------------|
| <b>Supplementary Results</b>        | <b>2</b>       |
| <b>Supplementary Figures 1 to 9</b> | <b>3 - 12</b>  |
| <b>Supplementary Tables 1 to 4</b>  | <b>13 - 40</b> |

### **Supplementary Results: miR-16 as plasma normaliser in samples from patients with chronic lymphocytic leukemia (CLL)**

The fact that plasma levels of miR-16 were consistently high in patients with CLL is surprising given the location of the gene in the 13q14 deleted region<sup>1</sup> and the confirmed tumor suppressor role of the miR-15a/16-1 cluster<sup>2</sup>. Therefore, we obtained malignant CD5<sup>+</sup>/CD19<sup>+</sup> cells collected along with the plasma from an independent set of 51 patients for which fluorescence in situ hybridization (FISH) panel of probes identified detectable defects, including 9 with known 13q deletion status. We compared miR-16 expression in paired plasma and malignant cell samples from a set of samples independent of the groups A to E. We found that the malignant cells with 13q deletion had significantly lower levels of miR-16 expression than did cells from other patients with a normal chromosome 13 (n = 42; P = 0.04). This confirms previously independently reported work<sup>1</sup>. However, the levels of expression for miR-16 in the “paired” plasma samples were similar between the 2 groups regardless of 13q deletion status (**Supplementary Figure 7**). This further supported the use of this miRNA as an internal control for the plasma study, and also confirms that for samples from different sources, even from patients with the same disease (such as cells or plasma from patients with CLL), different genes can have normalizer properties.

1. Calin GA, Dumitru CD, Shimizu M, et al. Frequent deletions and down-regulation of micro-RNA genes miR15 and miR16 at 13q14 in chronic lymphocytic leukemia. *Proc Natl Acad Sci U S A*. 2002;99(24):15524-15529.
2. Klein U, Lia M, Crespo M, et al. The DLEU2/miR-15a/16-1 cluster controls B cell proliferation and its deletion leads to chronic lymphocytic leukemia. *Cancer Cell*. 2010;17(1):28-40.

**Supplementary Figure 1. Normalizer 5S RNA Ct values in samples from groups A and B.** The normalizer was constantly expressed at approximately 19 cycles in both sets of samples. MBL, monoclonal B-cell lymphocytosis; CLL, chronic lymphocytic leukemia.

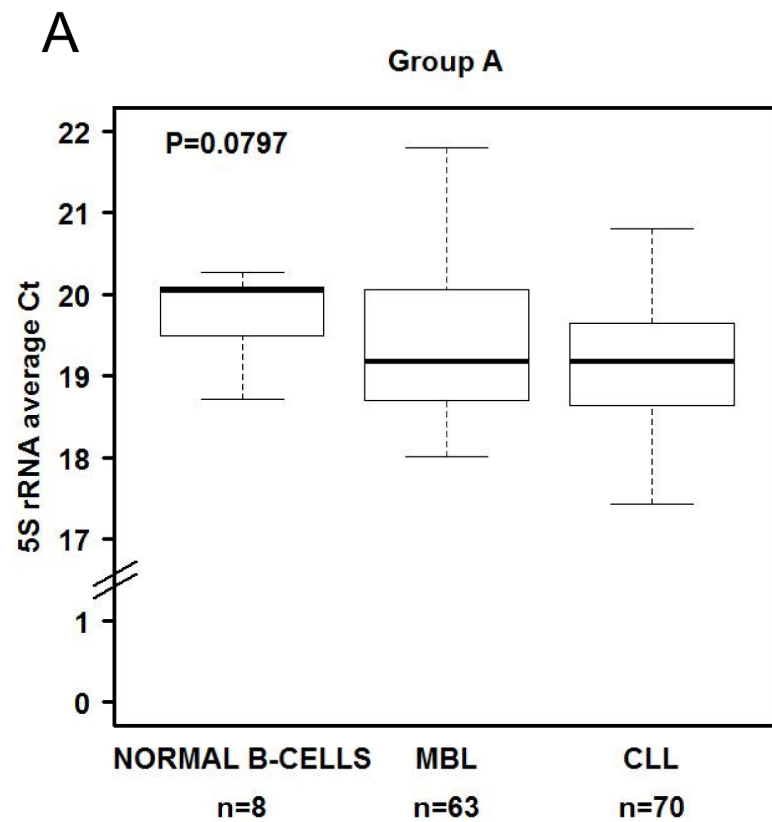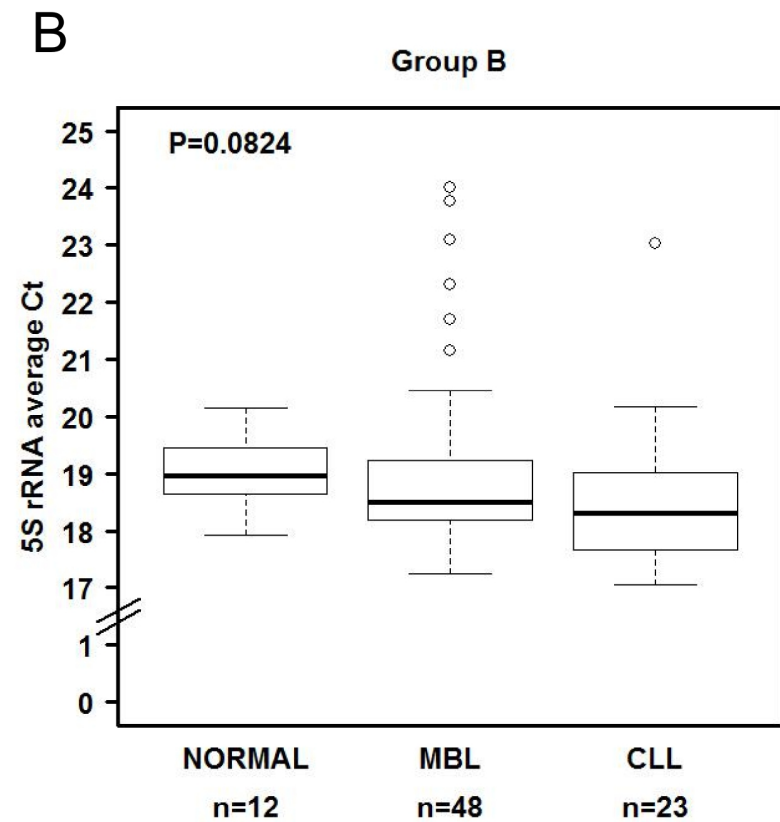

**Supplementary Figure 2. miR-15a, -16, and -21 levels in normal CD19<sup>+</sup> B-cells, monoclonal B-cell lymphocytosis (MBL) cells, and chronic lymphocytic leukemia (CLL) cells, groups A and B.**

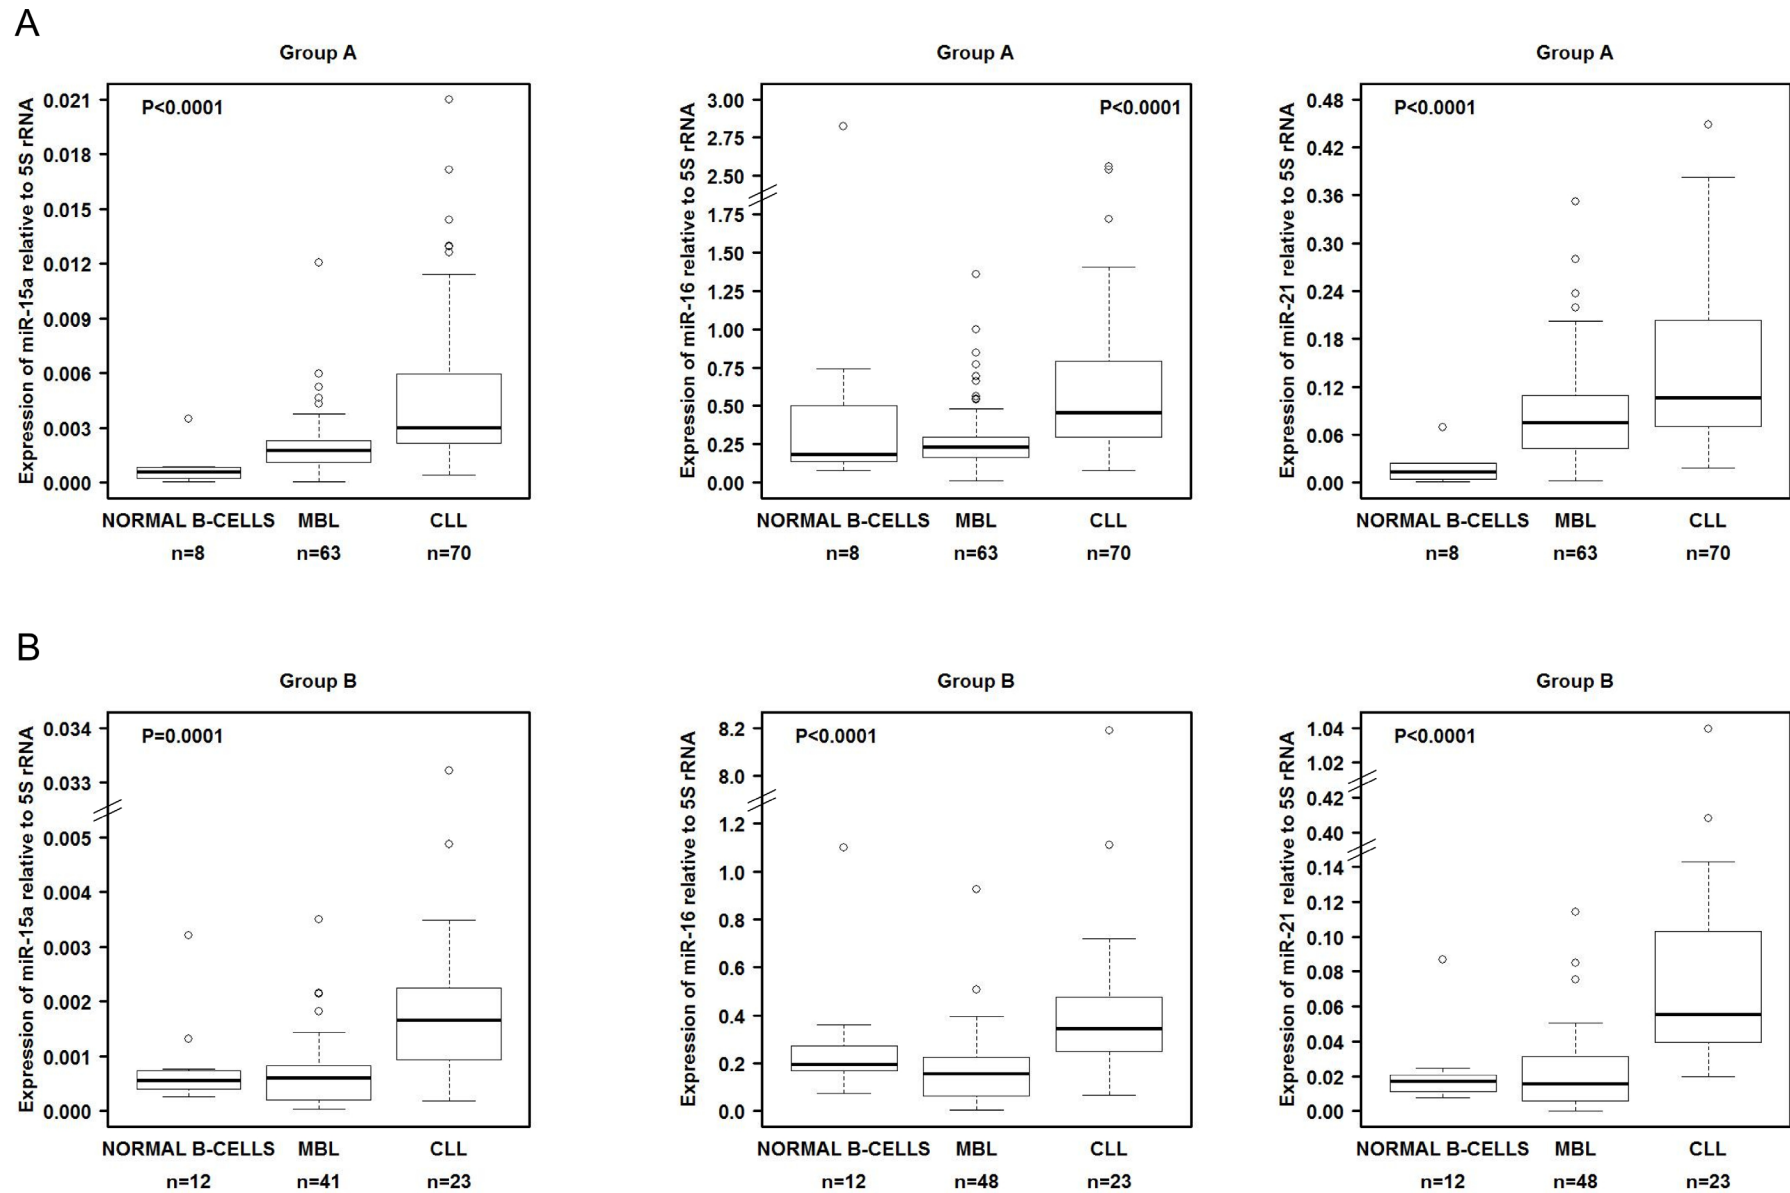

**Supplementary Figure 3. Relationship between levels of miR-155 and lymphocyte count in monoclonal B-cell lymphocytosis (MBL) cells.** MBL samples were grouped in sextiles according to absolute lymphocyte count, and the sextile group with the highest level of absolute lymphocyte count (MAXALC) was compared with the lowest sextile group in both groups A and B.

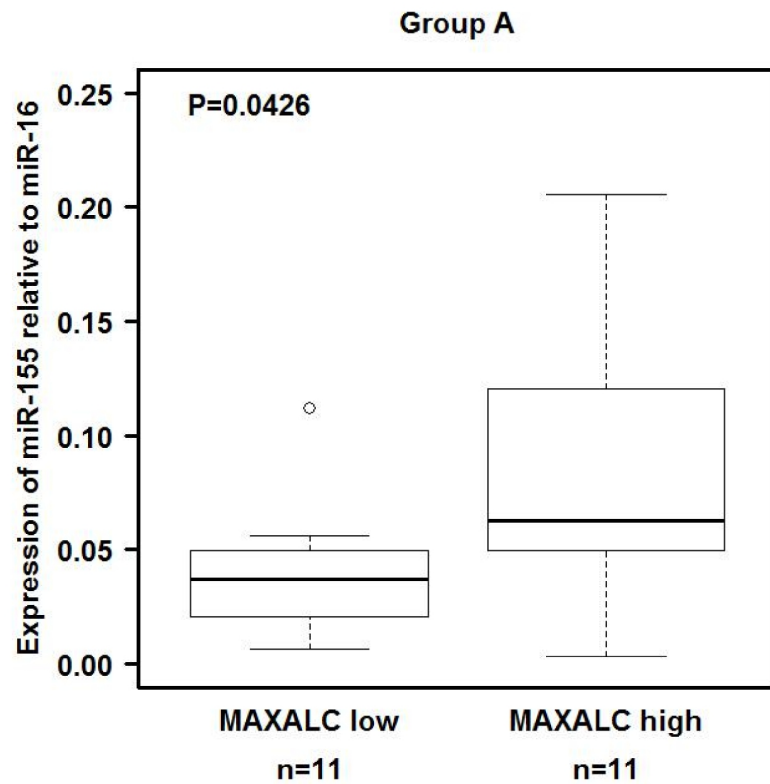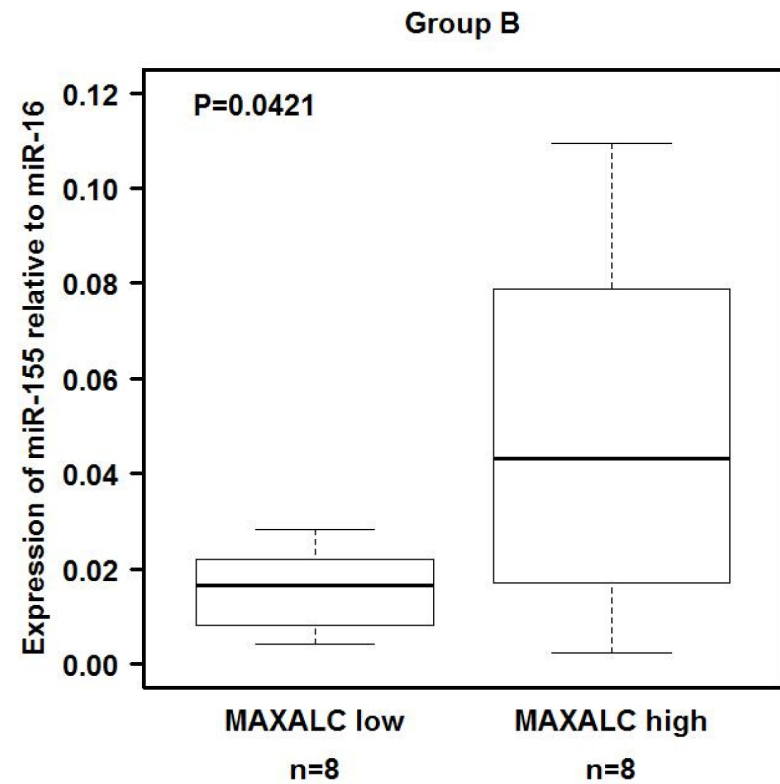

**Supplementary Figure 4. miR-21 expression is correlated with overall survival (OS) in patients with CLL in groups A and B.** We performed the data analyses for all patients together to reach a number (n = 93) similar to that reported by Rossi S, Shimizu M, Barbarotto E, et al. microRNA fingerprinting of CLL patients with chromosome 17p deletion identify a miR-21 score that stratifies early survival. *Blood* 2010; 116(6): 945-952.

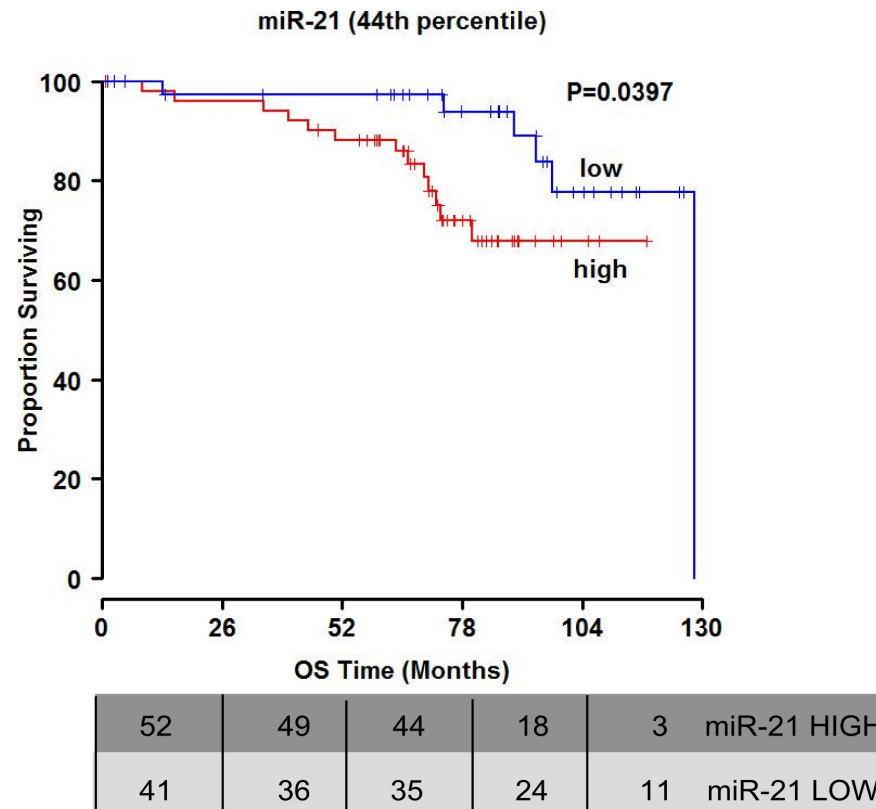

**Supplementary Figure 5. miR-16 and miR-155 expression in microvesicles (MVs) from individuals with monoclonal B-cell lymphocytosis (MBL) and chronic lymphocytic leukemia (CLL).** We used U6 snRNA as a normalizer. MVs were isolated from “platelet-free plasma” obtained from 1 individual with MBL, 1 patient with Rai stage 0 CLL, and 3 patients with CLL of higher stages.

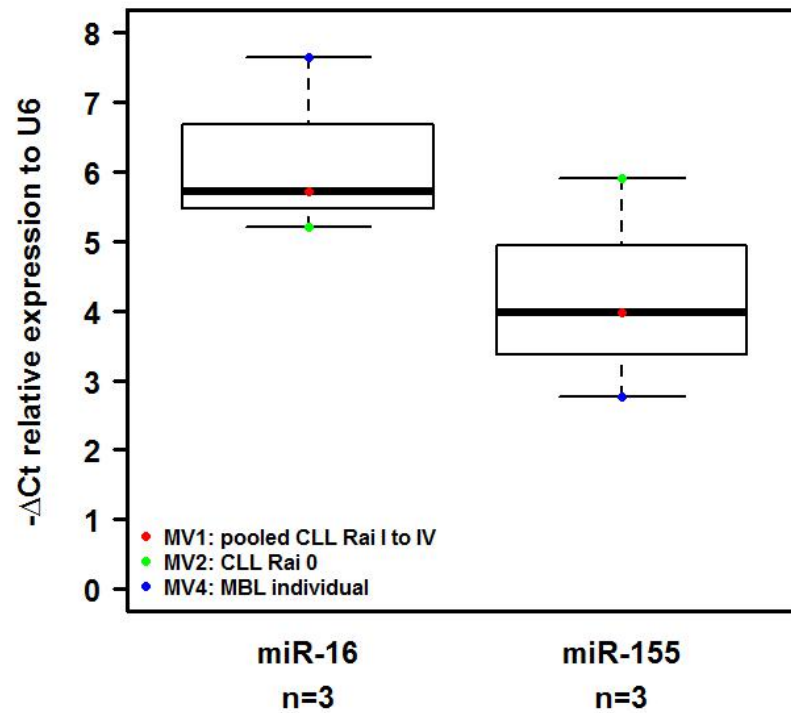

**Supplementary Figure 6. Normalizer selection. A.** Average Ct expression for miR-16 and miR-192 measured by qRT-PCR for the 143 group A patients treated with fludarabine, cyclophosphamide, and rituximab. A Ct threshold of 35 was used to determine whether a miRNA was expressed ( $Ct < 35$ ) or not expressed ( $Ct \geq 35$ ). About 10% of samples did not express miR-192, whereas all the samples expressed miR-16. **B.** miR-16 is not differentially expressed in pretreatment samples of group C patients with different response levels (CR, complete response, NPR, nodular partial response, PR, partial response, and NR, no response).

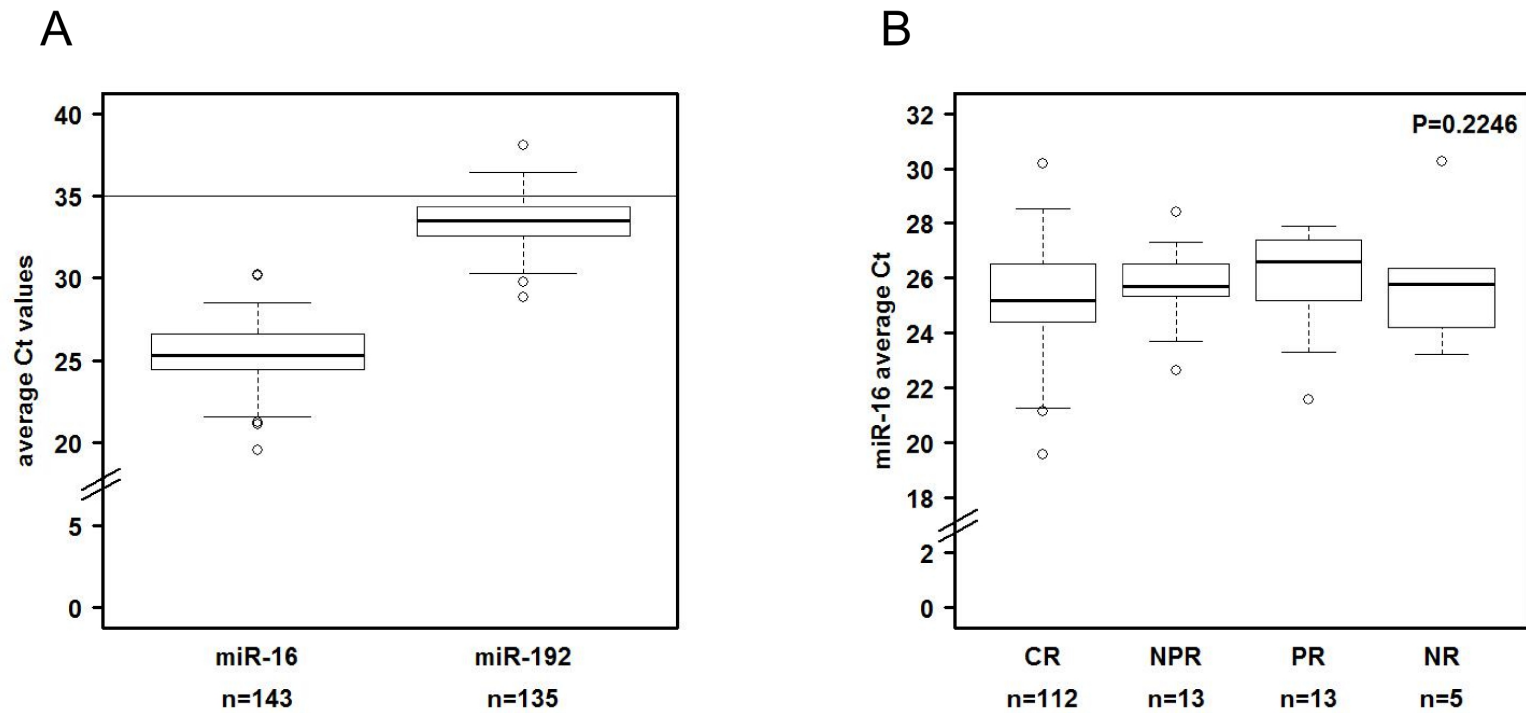



**Supplementary Figure 7. miR-16 as a normalizer in samples from groups D and E** **A.** miR-16 is expressed at equivalent levels in pretreatment leukemic samples from group D patients treated with fludarabine, cyclophosphamide, and rituximab in whom a complete response (CR) will be achieved, compared with partial (PR) or no response (NR). **B.** miR-16 is also expressed at equivalent levels in pretreatment samples of group E patients treated with lenalidomide in whom CR will be achieved, compared with other response levels (PR, NR, or NPR [nodular partial response]).

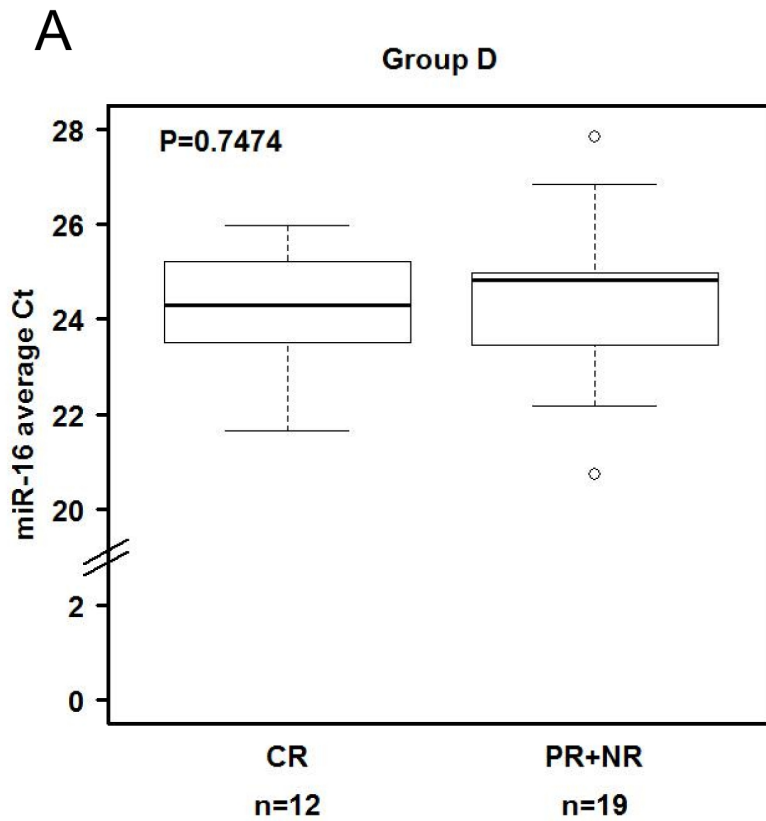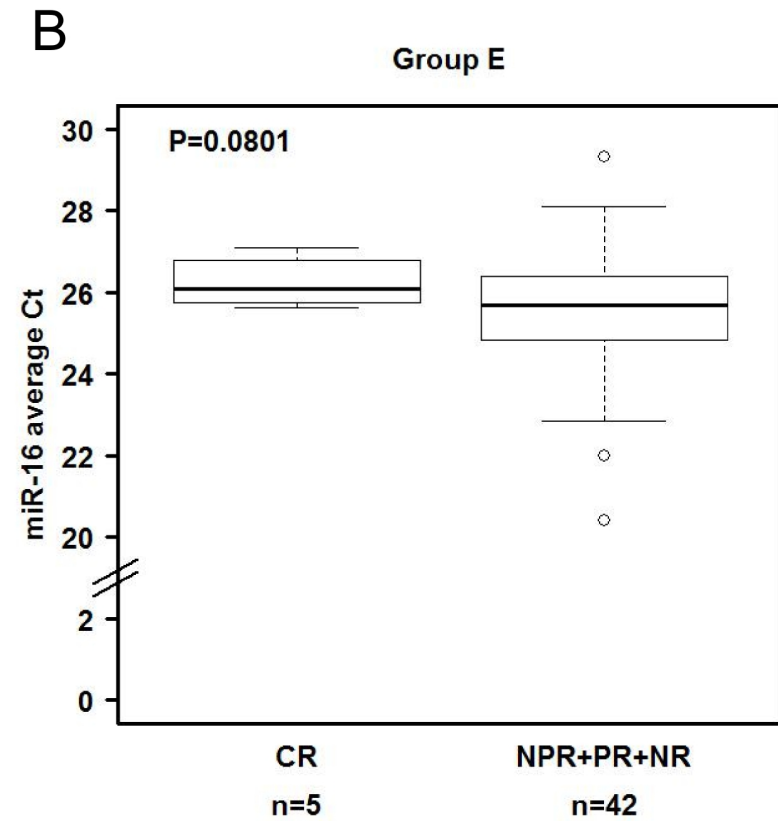

**Supplementary Figure 8. miR-16 as a plasma normalizer.** **A.** miR-16 is expressed at lower levels (higher Ct values) in chronic lymphocytic leukemia (CLL) cells with 13q deletion compared with CLL cells with normal chromosome 13q. **B.** miR-16 is not differentially expressed in CLL plasma with 13q deletion compared with CLL plasma with no detectable defects in chromosome 13q. The results were obtained in “paired” samples from the same set of 51 patients at MD Anderson that were independent of groups A to E.

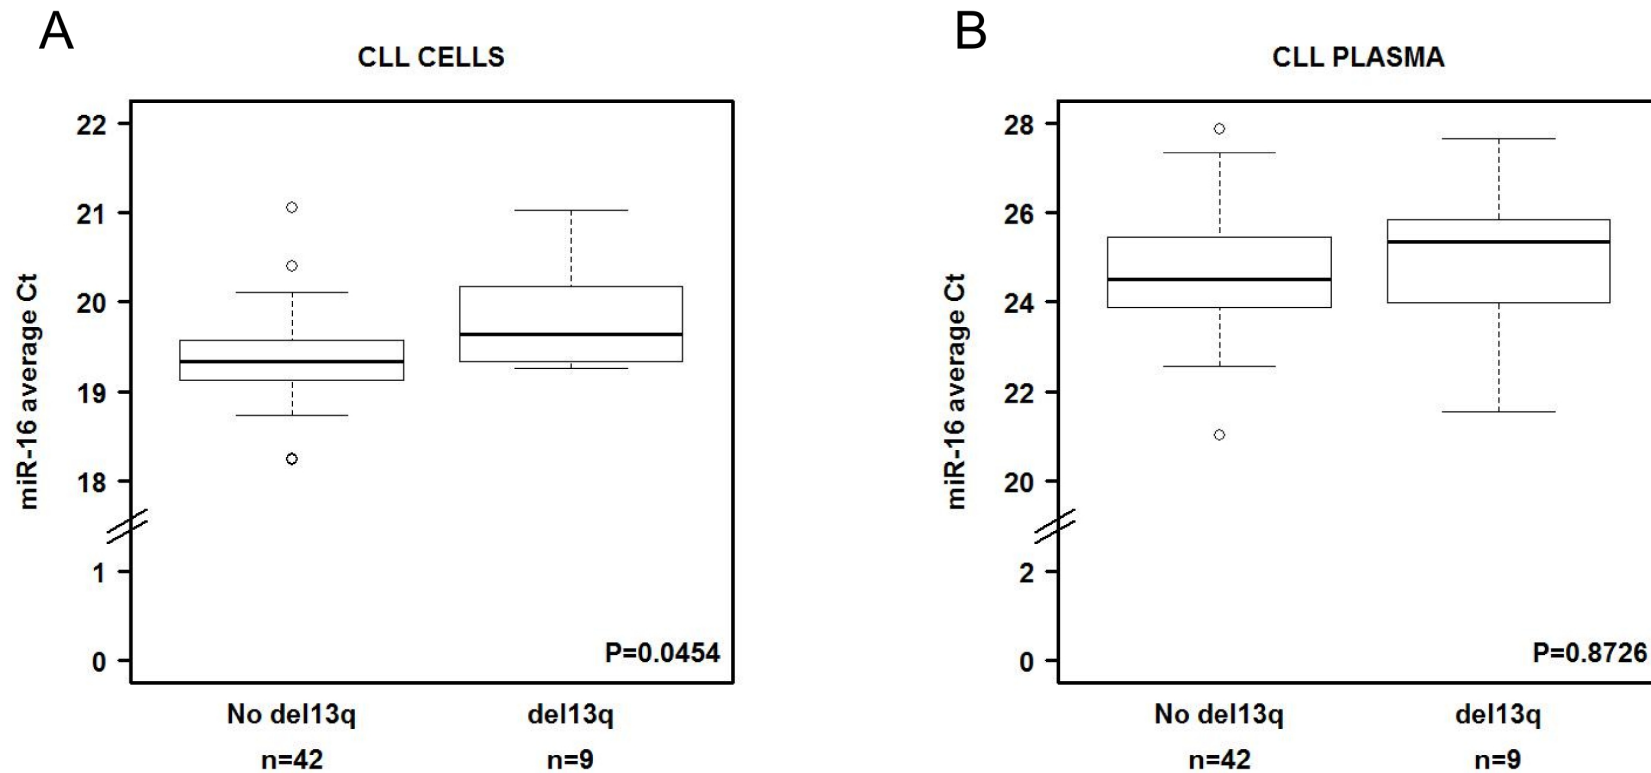

**Supplementary Figure 9. Relationship between relative miR-155 expression levels in plasma and overall survival for patients who experienced a complete response (CR) in group C (n = 112).** Kaplan-Meier survival curves according to relative expression levels of miR-155 in plasma are presented.

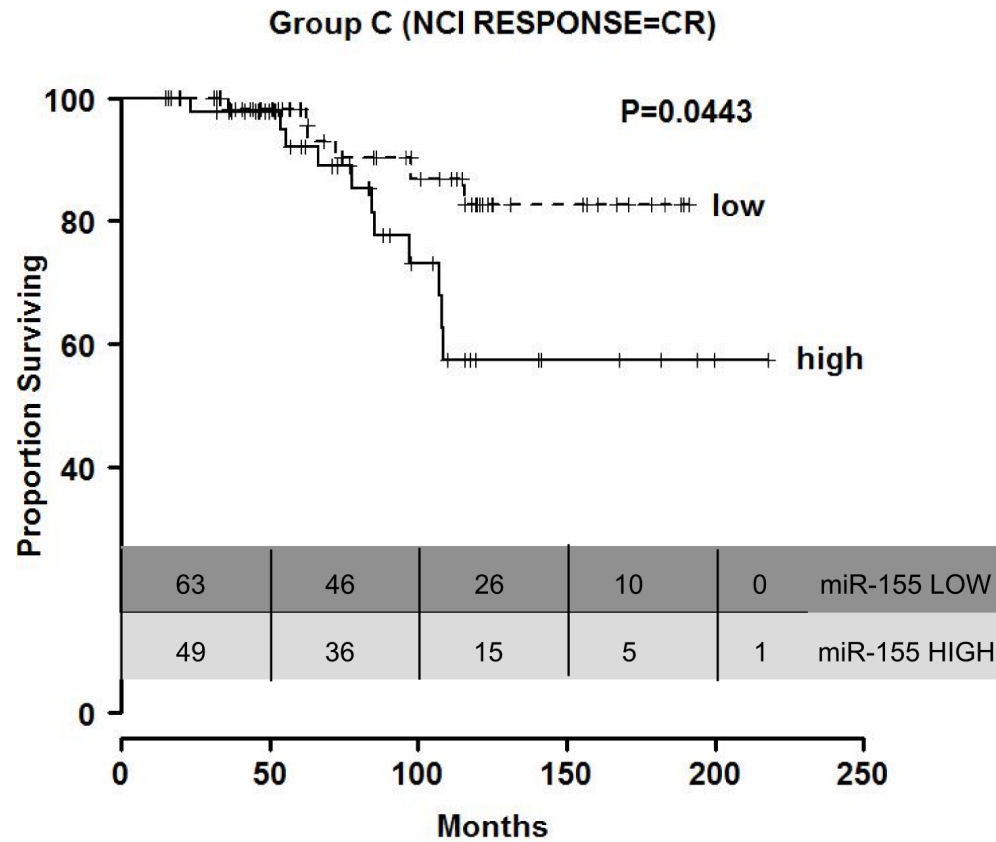

**Supplementary Figure 10. Correlations between plasma miR-155 levels detected by qRT-PCR and FISH abnormalities in CLL plasma samples from group C.** The P value was calculated using the Kruskal-Wallis test.

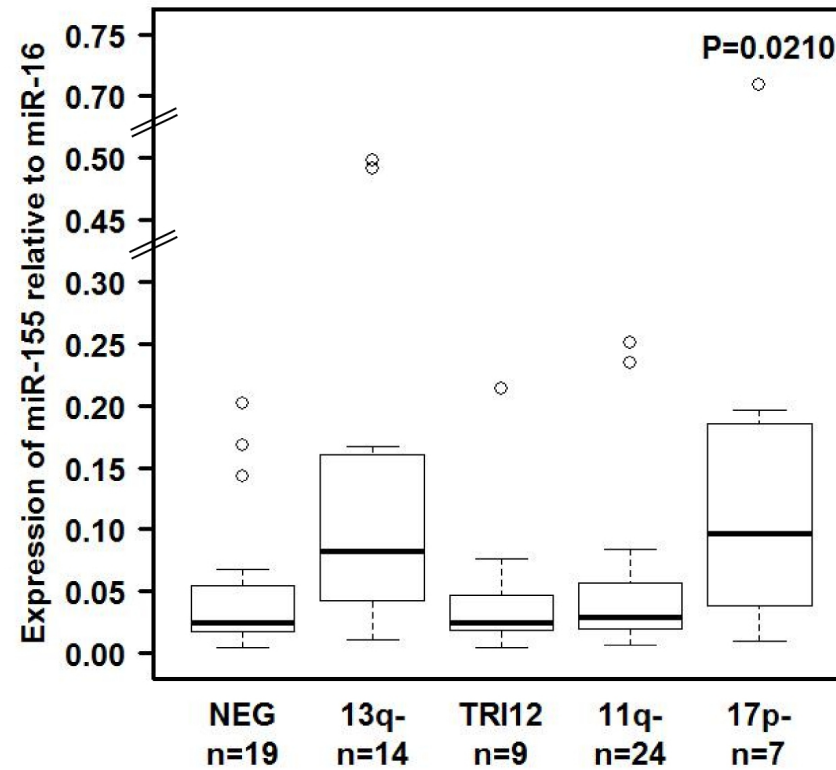

**Supplementary Table 1. Clinical characteristics of the patients from Mayo Clinic (groups A and B).**

| Patients with MBL |               |                       |       |       |       |     |             |        |      |       |
|-------------------|---------------|-----------------------|-------|-------|-------|-----|-------------|--------|------|-------|
| ID                | TTFT (months) | Treated/<br>Untreated | FISH  | VH    | ZAP70 | RAI | OS (months) | Status | ALC  | ALC   |
| MBL 001           | 19.06         | Not treated           | NEG   | MUT   | ND    | 0   | 121.69      | Alive  | 8.06 | 8.06  |
| MBL 002           | 64.1          | Treated               | TRI12 | UNMUT | NEG   | I   | 137.27      | Alive  | 7.67 | 7.67  |
| MBL 003           | 33.48         | Treated               | NEG   | UNMUT | ND    | I   | 130.07      | Alive  | 7.88 | 7.88  |
| MBL 004           | 120.02        | Not treated           | 13q-  | MUT   | NEG   | 0   | 123.47      | Alive  | 8    | 8     |
| MBL 005           | 1.02          | Not treated           | ND    | MUT   | ND    | 0   | 106.65      | Alive  | 5.11 | 5.12  |
| MBL 006           | 97.84         | Not treated           | ND    | MUT   | ND    | 0   | 119.39      | Alive  | 7.16 | 8.77  |
| MBL 007           | 0.43          | Not treated           | ND    | MUT   | ND    | 0   | 4.37        | Alive  | 6.92 | 6.92  |
| MBL 008           | 63.94         | Not treated           | ND    | MUT   | ND    | 0   | 69.03       | Dead   | 6.3  | 11.39 |
| MBL 009           | 36.37         | Not treated           | ND    | ND    | ND    | 0   | 92.19       | Alive  | 5.59 | 5.59  |
| MBL 010           | 7.85          | Not treated           | ND    | MUT   | ND    | 0   | 71.92       | Dead   | 6.23 | 7.13  |
| MBL 011           | 21.82         | Not treated           | NEG   | MUT   | NEG   | 0   | 86.51       | Alive  | 8.71 | 12.09 |
| MBL 012           | 84.5          | Not treated           | ND    | MUT   | ND    | 0   | 84.54       | Alive  | 4.71 | 8.14  |
| MBL 013           | 42.71         | Not treated           | 13q-  | MUT   | NEG   | 0   | 104.54      | Alive  | 6.91 | 10.08 |
| MBL 014           | 50.14         | Not treated           | 13q-  | MUT   | NEG   | 0   | 64.36       | Dead   | 7.43 | 7.43  |
| MBL 015           | 55.33         | Not treated           | NEG   | MUT   | ND    | 0   | 95.34       | Alive  | 5    | 9.3   |
| MBL 016           | 98.14         | Not treated           | TRI12 | MUT   | NEG   | 0   | 98.14       | Alive  | 4.74 | 5.45  |
| MBL 017           | 92.19         | Not treated           | NEG   | MUT   | NEG   | 0   | 92.19       | Alive  | 4.9  | 7.48  |
| MBL 018           | 87.2          | Not treated           | NEG   | MUT   | NEG   | II  | 87.2        | Alive  | 6.69 | 26.53 |
| MBL 019           | 59.47         | Not treated           | NEG   | MUT   | NEG   | III | 75.3        | Dead   | 7.8  | 7.8   |
| MBL 020           | 77.83         | Not treated           | 13q-  | UNMUT | NEG   | I   | 79.28       | Alive  | 6.43 | 38.82 |
| MBL 021           | 72.51         | Not treated           | 13q-  | UNMUT | NEG   | I   | 81.28       | Alive  | 5.03 | 25.04 |
| MBL 022           | 82.53         | Not treated           | 13q-  | UNMUT | NEG   | II  | 82.53       | Alive  | 4.96 | 7.49  |
| MBL 023           | 62.88         | Not treated           | 13q-  | MUT   | NEG   | I   | 82.2        | Alive  | 3.85 | 5.17  |
| MBL 024           | 85.62         | Not treated           | 13q-  | MUT   | NEG   | 0   | 85.62       | Alive  | 6.27 | 6.29  |
| MBL 025           | 45.21         | Not treated           | TRI12 | ND    | NEG   | I   | 73.86       | Alive  | 7.56 | 8.31  |
| MBL 026           | 42.02         | Not treated           | TRI12 | MUT   | NEG   | 0   | 55.13       | Alive  | 6.42 | 10.48 |

Supplemental data – Ferrajoli, Shanafelt, Ivan et al

|                |       |             |       |       |     |    |       |       |      |       |
|----------------|-------|-------------|-------|-------|-----|----|-------|-------|------|-------|
| <b>MBL 027</b> | 76.39 | Not treated | NEG   | MUT   | NEG | 0  | 76.39 | Alive | 8.82 | 8.82  |
| <b>MBL 028</b> | 71.79 | Not treated | 13q-  | MUT   | NEG | 0  | 71.79 | Alive | 6.1  | 6.1   |
| <b>MBL 029</b> | 48.07 | Not treated | TRI12 | UNMUT | POS | I  | 74.15 | Alive | 5.22 | 9.7   |
| <b>MBL 030</b> | 60.19 | Not treated | TRI12 | UNMUT | NEG | 0  | 67.42 | Alive | 5.99 | 9.96  |
| <b>MBL 031</b> | 57.79 | Not treated | NEG   | MUT   | NEG | 0  | 78.49 | Alive | 5.22 | 5.24  |
| <b>MBL 032</b> | 63.08 | Not treated | 11q-  | UNMUT | NEG | II | 71.92 | Dead  | 4.74 | 8.27  |
| <b>MBL 033</b> | 34.63 | Treated     | TRI12 | MUT   | POS | IV | 34.86 | Dead  | 5.61 | 8.56  |
| <b>MBL 034</b> | 52.86 | Treated     | TRI12 | MUT   | NEG | II | 71.95 | Alive | 7.01 | 12.56 |
| <b>MBL 035</b> | 0.43  | Not treated | NEG   | MUT   | NEG | 0  | 51.15 | Alive | 6.32 | 6.32  |
| <b>MBL 036</b> | 9.2   | Not treated | NEG   | MUT   | NEG | 0  | 50.53 | Alive | 6.55 | 7.49  |
| <b>MBL 037</b> | 23.03 | Not treated | 13q-  | MUT   | POS | 0  | 72.74 | Alive | 7.26 | 8.95  |
| <b>MBL 038</b> | 2     | Not treated | 13q-  | MUT   | NEG | 0  | 8.18  | Alive | 5.33 | 5.4   |
| <b>MBL 039</b> | 70.67 | Not treated | 13q-  | MUT   | POS | I  | 70.7  | Alive | 4.35 | 4.35  |
| <b>MBL 040</b> | 63.28 | Not treated | 13q-  | MUT   | NEG | 0  | 63.41 | Alive | 5.29 | 5.29  |
| <b>MBL 041</b> | 1.61  | Not treated | 13q-  | MUT   | NEG | 0  | 24.67 | Alive | 8.06 | 8.06  |
| <b>MBL 042</b> | 68.34 | Not treated | 13q-  | MUT   | NEG | 0  | 68.34 | Alive | 6.71 | 9.22  |
| <b>MBL 043</b> | 20.86 | Treated     | NEG   | UNMUT | POS | 0  | 60.19 | Dead  | 5    | 10.41 |
| <b>MBL 044</b> | 3.02  | Not treated | 13q-  | MUT   | NEG | 0  | 83.78 | Alive | 5.26 | 11.22 |
| <b>MBL 045</b> | 3.71  | Not treated | Other | UNMUT | NEG | 0  | 37.49 | Dead  | 6.59 | 11.66 |
| <b>MBL 046</b> | 63.11 | Not treated | TRI12 | MUT   | NEG | I  | 63.31 | Alive | 7.2  | 8.3   |
| <b>MBL 047</b> | 15.38 | Treated     | NEG   | MUT   | NEG | I  | 62.92 | Alive | 1.4  | 3.46  |
| <b>MBL 048</b> | 37.29 | Not treated | TRI12 | UNMUT | POS | 0  | 49.61 | Alive | 4.27 | 5.13  |
| <b>MBL 049</b> | 57.76 | Not treated | TRI12 | UNMUT | POS | 0  | 58.22 | Alive | 6.82 | 6.82  |
| <b>MBL 050</b> | 59.14 | Treated     | 13q-  | MUT   | NEG | 0  | 61.41 | Alive | 5.11 | 14.64 |
| <b>MBL 051</b> | 15.84 | Not treated | NEG   | MUT   | NEG | I  | 15.84 | Alive | 8.14 | 8.14  |
| <b>MBL 052</b> | 59.47 | Not treated | NEG   | MUT   | NEG | 0  | 59.47 | Alive | 4.5  | 9.01  |
| <b>MBL 053</b> | 62.42 | Not treated | TRI12 | MUT   | NEG | I  | 62.88 | Alive | 4.86 | 5.4   |
| <b>MBL 054</b> | 0.46  | Not treated | ND    | UNMUT | ND  | 0  | 78.98 | Alive | 5.75 | 6.14  |
| <b>MBL 055</b> | 93.14 | Not treated | 11q-  | UNMUT | POS | I  | 93.14 | Alive | 5.41 | 17.25 |
| <b>MBL 056</b> | 34.5  | Not treated | NEG   | MUT   | NEG | 0  | 94.75 | Alive | 4.49 | 8.04  |
| <b>MBL 057</b> | 66.1  | Not treated | 13q-  | MUT   | NEG | 0  | 86.77 | Dead  | 4.31 | 5.92  |

Supplemental data – Ferrajoli, Shanafelt, Ivan et al

|                |       |             |       |       |     |     |       |       |       |        |
|----------------|-------|-------------|-------|-------|-----|-----|-------|-------|-------|--------|
| <b>MBL 058</b> | 88.87 | Not treated | 13q-  | MUT   | NEG | 0   | 88.87 | Alive | 5.24  | 7.45   |
| <b>MBL 059</b> | 77.27 | Not treated | 13q-  | MUT   | NEG | I   | 77.31 | Alive | 6.29  | 11.96  |
| <b>MBL 060</b> | 0.92  | Not treated | NEG   | UNMUT | NEG | I   | 70.37 | Dead  | 3.39  | 5.22   |
| <b>MBL 061</b> | 2.69  | Not treated | 17p-  | MUT   | NEG | 0   | 57.92 | Alive | 7.06  | 7.06   |
| <b>MBL 062</b> | 54.7  | Not treated | 13q-  | MUT   | POS | I   | 54.7  | Alive | 4.19  | 5.26   |
| <b>MBL 063</b> | 55.36 | Not treated | TRI12 | MUT   | POS | II  | 55.36 | Alive | 3.45  | 8.58   |
| <b>MBL 064</b> | 0.62  | Not treated | ND    | MUT   | NEG | 0   | 16.95 | Alive | 8.88  | 8.88   |
| <b>MBL 065</b> | 25.59 | Not treated | NEG   | MUT   | NEG | 0   | 26.35 | Alive | 10.99 | 15.78  |
| <b>MBL 066</b> | 26.28 | Not treated | 13q-  | MUT   | NEG | I   | 33.12 | Alive | 5.7   | 14.16  |
| <b>MBL 067</b> | 31.67 | Treated     | 13q-  | MUT   | NEG | I   | 34    | Alive | 12.64 | 66.42  |
| <b>MBL 068</b> | 7.92  | Not treated | NEG   | MUT   | NEG | I   | 10.68 | Alive | 5.47  | 5.47   |
| <b>MBL 069</b> | 28.58 | Not treated | NEG   | UNMUT | NEG | 0   | 28.58 | Alive | 6.35  | 13.72  |
| <b>MBL 070</b> | 24.35 | Not treated | TRI12 | MUT   | NEG | 0   | 24.35 | Alive | 5.53  | 17.09  |
| <b>MBL 071</b> | 29.27 | Not treated | NEG   | MUT   | NEG | 0   | 29.27 | Alive | 4.68  | 7.69   |
| <b>MBL 072</b> | 28.52 | Not treated | NEG   | UNMUT | POS | 0   | 28.81 | Alive | 4.89  | 68.72  |
| <b>MBL 073</b> | 24.61 | Not treated | 13q-  | MUT   | NEG | 0   | 27.04 | Alive | 5.54  | 10.79  |
| <b>MBL 074</b> | 22.08 | Not treated | TRI12 | UNMUT | POS | I   | 22.08 | Alive | 5.13  | 12.36  |
| <b>MBL 075</b> | 0.62  | Not treated | ND    | MUT   | NEG | 0   | 1.28  | Alive | 7.65  | 7.65   |
| <b>MBL 076</b> | 27.5  | Not treated | 13q-  | MUT   | NEG | IV  | 27.5  | Alive | 5.74  | 56.3   |
| <b>MBL 077</b> | 18.33 | Not treated | TRI12 | UNMUT | POS | 0   | 18.76 | Alive | 6.97  | 38.87  |
| <b>MBL 078</b> | 2.53  | Not treated | ND    | MUT   | NEG | I   | 6.64  | Alive | 5.36  | 5.36   |
| <b>MBL 079</b> | 42.94 | Not treated | ND    | UNMUT | NEG | 0   | 43.5  | Alive | 5.83  | 11.55  |
| <b>MBL 080</b> | 18.92 | Not treated | TRI12 | UNMUT | POS | 0   | 18.96 | Alive | 7.71  | 11.47  |
| <b>MBL 081</b> | 19.98 | Not treated | NEG   | MUT   | NEG | 0   | 19.98 | Alive | 6.24  | 18.18  |
| <b>MBL 082</b> | 17.64 | Treated     | TRI12 | UNMUT | NEG | I   | 58.58 | Alive | 6.22  | 29.39  |
| <b>MBL 083</b> | 52.17 | Not treated | 13q-  | MUT   | NEG | I   | 52.21 | Alive | 2.51  | 131.32 |
| <b>MBL 084</b> | 3.02  | Not treated | NEG   | ND    | POS | 0   | 35.38 | Alive | 4.98  | 4.98   |
| <b>MBL 085</b> | 43.53 | Not treated | 13q-  | MUT   | NEG | III | 43.53 | Alive | 5.24  | 7.1    |
| <b>MBL 086</b> | 29.73 | Treated     | TRI12 | UNMUT | POS | II  | 49.18 | Dead  | 6.06  | 29.78  |
| <b>MBL 087</b> | 10.45 | Not treated | NEG   | UNMUT | NEG | I   | 52.93 | Alive | 6.12  | 12.3   |
| <b>MBL 088</b> | 41.96 | Not treated | 13q-  | MUT   | POS | I   | 41.96 | Alive | 11.17 | 39.42  |

Supplemental data – Ferrajoli, Shanafelt, Ivan et al

|                          |                      |                          |             |           |              |            |                    |               |            |            |
|--------------------------|----------------------|--------------------------|-------------|-----------|--------------|------------|--------------------|---------------|------------|------------|
| <b>MBL 089</b>           | 42.58                | Not treated              | 13q-        | MUT       | NEG          | I          | 42.58              | Alive         | 12.4       | 23.72      |
| <b>MBL 090</b>           | 2.89                 | Not treated              | 13q-        | MUT       | NEG          | 0          | 37.55              | Alive         | 10.65      | 44.26      |
| <b>MBL 091</b>           | 46                   | Not treated              | 13q-        | MUT       | NEG          | 0          | 46                 | Alive         | 5.52       | 12.87      |
| <b>MBL 092</b>           | 39.26                | Not treated              | ND          | ND        | ND           | II         | 39.26              | Alive         | 6.44       | 13.1       |
| <b>MBL 093</b>           | 3.12                 | Not treated              | ND          | MUT       | NEG          | 0          | 23.1               | Alive         | 3.56       | 3.56       |
| <b>MBL 094</b>           | 27.4                 | Treated                  | NEG         | UNMUT     | NEG          | IV         | 89.59              | Alive         | 18.63      | 2.82       |
| <b>MBL 095</b>           | 22.41                | Treated                  | NEG         | MUT       | NEG          | IV         | 43.99              | Alive         | 6.38       | 74.65      |
| <b>MBL 096</b>           | 15.18                | Not treated              | ND          | ND        | NEG          | 0          | 23.89              | Alive         | 7.68       | 11.34      |
| <b>MBL 097</b>           | 47.15                | Not treated              | TRI12       | MUT       | NEG          | I          | 49.41              | Alive         | 7.7        | 16.32      |
| <b>MBL 098</b>           | 42.02                | Not treated              | 13q-        | MUT       | NEG          | 0          | 42.02              | Alive         | 6.7        | 27.24      |
| <b>MBL 099</b>           | 1.15                 | Treated                  | TRI12       | ND        | NEG          | I          | 45.34              | Alive         | 4.9        | 0.62       |
| <b>MBL 100</b>           | 11.73                | Not treated              | 13q-        | UNMUT     | NEG          | 0          | 52.76              | Alive         | 7.8        | 11.42      |
| <b>MBL 101</b>           | 47.51                | Not treated              | 11q-        | UNMUT     | POS          | I          | 51.06              | Alive         | 3.62       | 74.12      |
| <b>MBL 102</b>           | 1.87                 | Not treated              | 11q-        | UNMUT     | NEG          | I          | 4.17               | Dead          | ND         | ND         |
| <b>MBL 103</b>           | 43.7                 | Not treated              | NEG         | MUT       | NEG          | 0          | 43.7               | Alive         | 7.61       | 22.27      |
| <b>MBL 104</b>           | 1.12                 | Not treated              | ND          | MUT       | NEG          | 0          | 42.91              | Dead          | 8.58       | 8.58       |
| <b>MBL 105</b>           | 0.69                 | Not treated              | 13q-        | MUT       | NEG          | 0          | 11.99              | Alive         | 7.72       | 6.17       |
| <b>MBL 106</b>           | 4.7                  | Treated                  | TRI12       | MUT       | NEG          | IV         | 54.41              | Alive         | 8.79       | 10.4       |
| <b>MBL 107</b>           | 4.11                 | Not treated              | Other       | UNMUT     | POS          | II         | 50.1               | Alive         | 9.39       | 80.11      |
| <b>MBL 108</b>           | 33.97                | Not treated              | NEG         | MUT       | NEG          | 0          | 34.46              | Alive         | 5.66       | 8.44       |
| <b>MBL 109</b>           | 0.46                 | Not treated              | 13q-        | ND        | NEG          | 0          | 22.83              | Alive         | 6.94       | ND         |
| <b>MBL 110</b>           | 42.65                | Not treated              | NEG         | MUT       | NEG          | 0          | 42.65              | Alive         | 6.73       | 7.01       |
| <b>MBL 111</b>           | 0.1                  | Not treated              | NEG         | MUT       | NEG          | I          | 30.29              | Alive         | 6.37       | 5.18       |
| <b>Patients with CLL</b> |                      |                          |             |           |              |            |                    |               |            |            |
| <b>ID</b>                | <b>TTFT (months)</b> | <b>Treated/Untreated</b> | <b>FISH</b> | <b>VH</b> | <b>ZAP70</b> | <b>RAI</b> | <b>OS (months)</b> | <b>Status</b> | <b>ALC</b> | <b>ALC</b> |
| <b>CLLRai0 001</b>       | 0                    | Not treated              | ND          | MUT       | ND           | 0          | 69.78              | Dead          | 6.6        | 7.88       |
| <b>CLLRai0 002</b>       | 69.19                | Not treated              | 13q-        | MUT       | NEG          | 0          | 70.64              | Dead          | 7.24       | 20         |
| <b>CLLRai0 003</b>       | 68.96                | Not treated              | 13q-        | MUT       | POS          | 0          | 76.26              | Alive         | 7.29       | 8.5        |
| <b>CLLRai0 004</b>       | 73.82                | Not treated              | NEG         | MUT       | NEG          | 0          | 73.86              | Alive         | 9.4        | 11.33      |
| <b>CLLRai0 005</b>       | 48.76                | Not treated              | NEG         | MUT       | POS          | 0          | 59.4               | Alive         | 14.35      | 36.48      |



Supplemental data – Ferrajoli, Shanafelt, Ivan et al

|                    |        |             |       |       |     |     |        |       |       |        |
|--------------------|--------|-------------|-------|-------|-----|-----|--------|-------|-------|--------|
| <b>CLLRai0 006</b> | 2.56   | Not treated | 17p-  | MUT   | NEG | 0   | 81.25  | Alive | 14.7  | 30.97  |
| <b>CLLRai0 007</b> | 12.62  | Not treated | TRI12 | UNMUT | NEG | 0   | 84.14  | Alive | 9.98  | 15.17  |
| <b>CLLRai0 008</b> | 0.2    | Not treated | 13q-  | MUT   | NEG | 0   | 57.23  | Alive | 6.55  | 6.55   |
| <b>CLLRai0 009</b> | 9.2    | Not treated | 13q-  | MUT   | NEG | 0   | 84.21  | Alive | 17.71 | 26.62  |
| <b>CLLRai0 010</b> | 78.72  | Not treated | 13q-  | MUT   | NEG | 0   | 89.23  | Alive | 10.4  | 12.32  |
| <b>CLLRai0 011</b> | 41.07  | Treated     | 13q-  | MUT   | NEG | I   | 84.44  | Alive | 14.02 | 37.58  |
| <b>CLLRai0 012</b> | 50.92  | Not treated | 13q-  | MUT   | NEG | II  | 79.57  | Alive | 21.18 | 43.53  |
| <b>CLLRai0 013</b> | 10.97  | Not treated | 17p-  | MUT   | NEG | 0   | 90.05  | Alive | 15.36 | 26.95  |
| <b>CLLRai0 014</b> | 63.21  | Not treated | 13q-  | MUT   | NEG | II  | 63.21  | Alive | 12.23 | 14.11  |
| <b>CLLRai0 015</b> | 32.95  | Not treated | 13q-  | MUT   | ND  | 0   | 70.67  | Alive | 12.63 | 15.97  |
| <b>CLLRai0 016</b> | 43.37  | Not treated | 13q-  | MUT   | NEG | II  | 46.65  | Alive | 18.78 | 54.59  |
| <b>CLLRai0 017</b> | 2.56   | Not treated | 17p-  | UNMUT | POS | 0   | 74.09  | Alive | 23.57 | 27.81  |
| <b>CLLRai0 018</b> | 16.1   | Not treated | 13q-  | MUT   | NEG | 0   | 58.94  | Alive | 17.61 | 122.61 |
| <b>CLLRai0 019</b> | 64.1   | Not treated | 13q-  | MUT   | POS | II  | 67.68  | Alive | 7.74  | 12.21  |
| <b>CLLRai0 020</b> | 10.51  | Treated     | 13q-  | UNMUT | POS | 0   | 76.12  | Alive | 60.1  | 103.77 |
| <b>CLLRai0 021</b> | 5.95   | Not treated | TRI12 | UNMUT | NEG | 0   | 77.77  | Alive | 15.63 | 24.66  |
| <b>CLLRai0 022</b> | 64.59  | Not treated | 13q-  | UNMUT | NEG | I   | 65.02  | Alive | 16.69 | 21.45  |
| <b>CLLRai0 023</b> | 49.91  | Treated     | TRI12 | MUT   | POS | 0   | 112.56 | Alive | 48.92 | 106.12 |
| <b>CLLRai0 024</b> | 13.21  | Treated     | 17p-  | UNMUT | POS | 0   | 40.35  | Dead  | 22.31 | 256.5  |
| <b>CLLRai0 025</b> | 7.85   | Not treated | 11q-  | UNMUT | NEG | I   | 73.56  | Alive | 15.62 | 16.2   |
| <b>CLLRai0 026</b> | 63.54  | Not treated | TRI12 | UNMUT | NEG | II  | 63.61  | Dead  | 9.5   | 10.16  |
| <b>CLLRai0 027</b> | 14.03  | Treated     | 13q-  | MUT   | POS | IV  | 99.35  | Alive | 9.09  | 18.4   |
| <b>CLLRai0 028</b> | 55.2   | Not treated | ND    | MUT   | ND  | 0   | 66.33  | Dead  | 9.54  | 11.52  |
| <b>CLLRai0 029</b> | 34.07  | Not treated | NEG   | MUT   | NEG | 0   | 107.53 | Alive | 27.31 | 64.76  |
| <b>CLLRai0 030</b> | 48.72  | Not treated | TRI12 | ND    | NEG | 0   | 85.52  | Alive | 36.55 | 54     |
| <b>CLLRai0 031</b> | 14.09  | Treated     | 13q-  | UNMUT | NEG | III | 15.7   | Dead  | 32.4  | 201.82 |
| <b>CLLRai0 032</b> | 54.57  | Not treated | 13q-  | MUT   | ND  | 0   | 80.23  | Dead  | 7.02  | 8.29   |
| <b>CLLRai0 033</b> | 76.52  | Not treated | NEG   | MUT   | NEG | 0   | 126    | Alive | 24.7  | 26.01  |
| <b>CLLRai0 034</b> | 116.34 | Not treated | NEG   | MUT   | NEG | 0   | 116.34 | Alive | 13.2  | 13.2   |
| <b>CLLRai0 035</b> | 101.06 | Treated     | 13q-  | MUT   | NEG | III | 117.95 | Alive | 16.73 | 26.62  |
| <b>CLLRai0 036</b> | 107.17 | Not treated | NEG   | UNMUT | NEG | 0   | 128.3  | Dead  | 12.44 | 23.6   |

Supplemental data – Ferrajoli, Shanafelt, Ivan et al

|                      |        |             |       |       |     |     |        |       |        |        |
|----------------------|--------|-------------|-------|-------|-----|-----|--------|-------|--------|--------|
| <b>CLLRai0 037</b>   | 0.23   | Not treated | ND    | MUT   | ND  | 0   | 0.66   | Alive | 10.95  | 10.95  |
| <b>CLLRai0 038</b>   | 0.16   | Not treated | ND    | ND    | ND  | 0   | 34.99  | Dead  | 10.58  | ND     |
| <b>CLLRai0 039</b>   | 110.13 | Not treated | NEG   | MUT   | ND  | 0   | 110.13 | Alive | 10.49  | 13.2   |
| <b>CLLRai0 040</b>   | 102.08 | Not treated | 13q-  | MUT   | NEG | I   | 102.08 | Alive | 9.51   | 19.04  |
| <b>CLLRai0 041</b>   | 65.61  | Treated     | 13q-  | UNMUT | ND  | 0   | 85.72  | Alive | 7.08   | 7.08   |
| <b>CLLRai0 042</b>   | 70.51  | Not treated | 13q-  | MUT   | NEG | 0   | 70.51  | Alive | 10.5   | 36.58  |
| <b>CLLRai0 043</b>   | 51.42  | Not treated | 13q-  | MUT   | NEG | 0   | 59.5   | Alive | 25.81  | 92.74  |
| <b>CLLRai0 044</b>   | 60.22  | Not treated | 13q-  | MUT   | NEG | 0   | 60.22  | Alive | 21.28  | 31     |
| <b>CLLRai0 045</b>   | 2.96   | Not treated | 13q-  | UNMUT | POS | 0   | 34.69  | Alive | 13.15  | 24.17  |
| <b>CLLRai0 046</b>   | 2.53   | Not treated | 13q-  | MUT   | NEG | 0   | 2.53   | Alive | 21.67  | 21.67  |
| <b>CLLRai0 047</b>   | 62.56  | Not treated | 13q-  | MUT   | POS | II  | 62.56  | Alive | 21.39  | 56.82  |
| <b>CLLRai0 048</b>   | 1.12   | Not treated | 13q-  | MUT   | NEG | 0   | 1.12   | Alive | 10.44  | 10.44  |
| <b>CLLRai0 049</b>   | 4.9    | Not treated | 13q-  | MUT   | POS | 0   | 4.9    | Alive | 10.49  | 11.55  |
| <b>CLLRai1-4 001</b> | 38.54  | Treated     | TRI12 | UNMUT | ND  | IV  | 72.38  | Dead  | 18.73  | 35.37  |
| <b>CLLRai1-4 002</b> | 24.28  | Treated     | TRI12 | UNMUT | ND  | III | 44.65  | Dead  | 7.45   | 101.52 |
| <b>CLLRai1-4 003</b> | 65.09  | Treated     | ND    | ND    | ND  | II  | 73.96  | Dead  | 12.3   | 12.3   |
| <b>CLLRai1-4 004</b> | 22.64  | Treated     | 13q-  | MUT   | ND  | IV  | 115.52 | Alive | 14.22  | 56.97  |
| <b>CLLRai1-4 005</b> | 78.33  | Treated     | TRI12 | MUT   | POS | I   | 104.35 | Alive | 23.98  | 36.03  |
| <b>CLLRai1-4 006</b> | 20.04  | Treated     | NEG   | MUT   | ND  | II  | 110.13 | Alive | 10.56  | 55.2   |
| <b>CLLRai1-4 007</b> | 14.16  | Treated     | TRI12 | ND    | ND  | II  | 87.69  | Alive | 22.75  | 39.97  |
| <b>CLLRai1-4 008</b> | 0      | Treated     | ND    | UNMUT | ND  | IV  | 13.11  | Dead  | 186.53 | 186.53 |
| <b>CLLRai1-4 009</b> | 79.61  | Not treated | ND    | MUT   | ND  | II  | 106.45 | Alive | 17.32  | 17.32  |
| <b>CLLRai1-4 010</b> | 124.95 | Not treated | 13q-  | MUT   | NEG | I   | 124.95 | Alive | 30.71  | 41.35  |
| <b>CLLRai1-4 011</b> | 1.61   | Treated     | TRI12 | UNMUT | ND  | III | 73.4   | Dead  | 43.84  | 43.84  |
| <b>CLLRai1-4 012</b> | 0.95   | Treated     | ND    | MUT   | ND  | II  | 65.25  | Alive | 92.56  | 92.56  |
| <b>CLLRai1-4 013</b> | 41.63  | Not treated | TRI12 | MUT   | POS | II  | 50.53  | Dead  | 7.65   | 12.32  |
| <b>CLLRai1-4 014</b> | 23.59  | Not treated | NEG   | UNMUT | POS | II  | 95.38  | Alive | 16.41  | 81.18  |
| <b>CLLRai1-4 015</b> | 79.67  | Treated     | 13q-  | MUT   | POS | III | 93.64  | Alive | 18.18  | 57.15  |
| <b>CLLRai1-4 016</b> | 2      | Not treated | 13q-  | UNMUT | POS | I   | 66.4   | Alive | 6.82   | 6.82   |
| <b>CLLRai1-4 017</b> | 48.13  | Treated     | 13q-  | MUT   | POS | I   | 98.5   | Alive | 12     | 34.67  |
| <b>CLLRai1-4 018</b> | 4.04   | Treated     | TRI12 | UNMUT | ND  | I   | 96.36  | Alive | 19.58  | 38.55  |

Supplemental data – Ferrajoli, Shanafelt, Ivan et al

|                      |       |             |       |       |     |     |          |       |        |        |
|----------------------|-------|-------------|-------|-------|-----|-----|----------|-------|--------|--------|
| <b>CLLRai1-4 019</b> | 85.75 | Not treated | 13q-  | MUT   | POS | II  | 86.01    | Alive | 7.34   | 9.86   |
| <b>CLLRai1-4 020</b> | 13.44 | Not treated | 13q-  | UNMUT | ND  | I   | 13.63    | Alive | 7.1    | 10.38  |
| <b>CLLRai1-4 021</b> | 1.15  | Treated     | Other | UNMUT | NEG | II  | 106.42   | Alive | 119.23 | 119.23 |
| <b>CLLRai1-4 022</b> | 32.2  | Treated     | 13q-  | UNMUT | NEG | III | 97.48    | Dead  | 13.53  | 26.5   |
| <b>CLLRai1-4 023</b> | 2     | Treated     | 13q-  | UNMUT | POS | II  | 105.3    | Alive | 34.18  | 39.04  |
| <b>CLLRai1-4 024</b> | 2     | Treated     | TRI12 | UNMUT | ND  | II  | 83.29    | Alive | 19.76  | 25.96  |
| <b>CLLRai1-4 025</b> | 97.74 | Not treated | 17p-  | MUT   | NEG | I   | 97.74    | Alive | 6.08   | 22.23  |
| <b>CLLRai1-4 026</b> | 46.29 | Not treated | 13q-  | MUT   | NEG | I   | 59.86    | Alive | 20.3   | 48.22  |
| <b>CLLRai1-4 027</b> | 2.63  | Treated     | 17p-  | UNMUT | NEG | I   | 8.74     | Dead  | 53.68  | 114.75 |
| <b>CLLRai1-4 028</b> | 0.53  | Not treated | 13q-  | MUT   | POS | I   | 93.9     | Alive | 5.33   | 18.6   |
| <b>CLLRai1-4 029</b> | 38.6  | Treated     | TRI12 | UNMUT | POS | I   | 55.75    | Alive | 7.12   | 9.2    |
| <b>CLLRai1-4 030</b> | 90.32 | Not treated | NEG   | MUT   | NEG | I   | 90.32    | Alive | 16.72  | 22.1   |
| <b>CLLRai1-4 031</b> | 4.11  | Not treated | TRI12 | UNMUT | POS | II  | 82.27    | Alive | 11.18  | 18.22  |
| <b>CLLRai1-4 032</b> | 67.58 | Treated     | NEG   | UNMUT | NEG | I   | 88.71    | Alive | 35.17  | 57.89  |
| <b>CLLRai1-4 033</b> | 2.3   | Not treated | TRI12 | MUT   | ND  | I   | 71.39    | Alive | 6      | 6.11   |
| <b>CLLRai1-4 034</b> | 57.17 | Not treated | TRI12 | UNMUT | POS | I   | 66.14    | Alive | 6.01   | 6.01   |
| <b>CLLRai1-4 035</b> | 4.11  | Treated     | TRI12 | MUT   | NEG | I   | 85.72    | Alive | 6.78   | 7.25   |
| <b>CLLRai1-4 036</b> | 57.99 | Treated     | NEG   | UNMUT | NEG | IV  | 94.096   | Dead  | 12.95  | 149.09 |
| <b>CLLRai1-4 037</b> | 18.6  | Treated     | 13q-  | MUT   | ND  | I   | 89.29921 | Dead  | 10.32  | 21.6   |
| <b>CLLRai1-4 038</b> | 2.56  | Not treated | TRI12 | UNMUT | POS | I   | 73.59464 | Alive | 12.58  | 133.67 |
| <b>CLLRai1-4 039</b> | 12.09 | Not treated | 13q-  | MUT   | NEG | I   | 66.62943 | Alive | 6.25   | 6.55   |
| <b>CLLRai1-4 040</b> | 12.78 | Treated     | 11q-  | UNMUT | NEG | IV  | 77.99717 | Alive | 136.22 | 253.72 |
| <b>CLLRai1-4 041</b> | 2.66  | Not treated | NEG   | UNMUT | POS | I   | 74.74455 | Alive | 37.35  | 203.94 |
| <b>CLLRai1-4 042</b> | 73.76 | Not treated | 13q-  | MUT   | NEG | IV  | 73.9889  | Alive | 9.86   | 122.11 |
| <b>CLLRai1-4 043</b> | 72.71 | Not treated | NEG   | MUT   | POS | I   | 72.70756 | Alive | 5.67   | 14.61  |
| <b>CLLRai1-4 044</b> | 50.27 | Not treated | 13q-  | MUT   | POS | IV  | 65.08526 | Alive | 5.6    | 38.12  |

TTFT = time from diagnosis to first treatment; FISH = fluorescence in situ hybridization; VH = IgHV mutation status; RAI = highest RAI stage; OS = overall survival; ALC = absolute lymphocyte count; MaxALC = maximum ALC value after the diagnosis date; ND = not done.

**Supplementary Table 2. Clinical characteristics of patients with chronic lymphocytic leukemia (CLL) from MD Anderson and University of Southern California San Diego (groups C, D, and E).**

| ID     | Sex | Age | TTFT (months) | B2M | FISH | VH    | ZAP70 | RAI | Treatment | NCI response | OS (months) | Status |
|--------|-----|-----|---------------|-----|------|-------|-------|-----|-----------|--------------|-------------|--------|
| CLL001 | F   | 56  | 17.84         | 3.1 | ND   | MUT   | NEG   | 0   | FCR       | CR           | 36.23       | DEAD   |
| CLL002 | F   | 57  | 75.24         | 2.7 | ND   | MUT   | NEG   | 1   | FCR       | CR           | 188.37      | ALIVE  |
| CLL003 | M   | 57  | 58.18         | 2.7 | ND   | MUT   | NEG   | 1   | FCMR      | CR           | 119.43      | ALIVE  |
| CLL004 | F   | 66  | 21.19         | 5.6 | ND   | MUT   | POS   | 3   | FCR       | CR           | 85.17       | DEAD   |
| CLL005 | M   | 56  | 53.55         | 3.2 | ND   | MUT   | NEG   | 2   | FCR       | CR           | 170.93      | ALIVE  |
| CLL006 | M   | 53  | 28.71         | 4.6 | ND   | UNMUT | ND    | 2   | FCR       | CR           | 141.53      | ALIVE  |
| CLL007 | M   | 49  | 0.76          | 4.4 | ND   | UNMUT | POS   | 4   | FCR       | CR           | 53.87       | DEAD   |
| CLL008 | F   | 52  | 77.60         | 2.4 | ND   | MUT   | NEG   | 1   | FCR       | CR           | 191         | ALIVE  |
| CLL009 | M   | 57  | 1.61          | 4.4 | ND   | MUT   | POS   | 1   | FCR       | CR           | 111.23      | ALIVE  |
| CLL010 | F   | 39  | 41.63         | 8.3 | ND   | UNMUT | NEG   | 4   | FCR       | CR           | 120.8       | ALIVE  |
| CLL011 | F   | 62  | 42.18         | 5.9 | ND   | UNMUT | NEG   | 1   | FCR       | NR           | 83.23       | DEAD   |
| CLL012 | F   | 51  | 40.57         | 3.2 | ND   | UNMUT | POS   | 1   | FCR       | CR           | 156.9       | ALIVE  |
| CLL013 | M   | 56  | 66.69         | 9.3 | ND   | UNMUT | POS   | 2   | FCR       | CR           | 178.47      | ALIVE  |
| CLL014 | F   | 50  | 43.30         | 4.8 | ND   | ND    | ND    | 2   | FCR       | NPR          | 151.83      | ALIVE  |
| CLL015 | M   | 55  | 8.31          | 2.4 | ND   | UNMUT | POS   | 1   | FCR       | CR           | 123.2       | ALIVE  |
| CLL016 | M   | 66  | 37.36         | 1.8 | ND   | UNMUT | POS   | 1   | FCR       | CR           | 108.6       | DEAD   |
| CLL017 | M   | 61  | 1.35          | 3.3 | ND   | MUT   | NEG   | 4   | FCR       | CR           | 76.57       | ALIVE  |
| CLL018 | M   | 55  | 2.40          | 3.1 | ND   | UNMUT | NEG   | 3   | FCR       | NPR          | 116.7       | ALIVE  |
| CLL019 | M   | 58  | 1.81          | 3.7 | ND   | UNMUT | POS   | 4   | FCR       | CR           | 84.63       | DEAD   |
| CLL020 | M   | 68  | 47.21         | 5.4 | ND   | UNMUT | ND    | 3   | FCR       | PR           | 93.07       | DEAD   |
| CLL021 | M   | 61  | 67.78         | 2.1 | ND   | MUT   | NEG   | 2   | FCR       | NPR          | 120.97      | DEAD   |
| CLL022 | M   | 37  | 1.68          | 2.2 | ND   | UNMUT | POS   | 2   | FCR       | CR           | 115.8       | ALIVE  |
| CLL023 | F   | 52  | 27.93         | 2.9 | ND   | ND    | ND    | 1   | FCR       | CR           | 115.5       | DEAD   |
| CLL024 | M   | 61  | 1.18          | 7.4 | ND   | UNMUT | POS   | 4   | FCR       | CR           | 104.87      | ALIVE  |
| CLL025 | M   | 63  | 19.61         | 3.1 | ND   | MUT   | NEG   | 2   | FCR       | CR           | 124.77      | ALIVE  |
| CLL026 | M   | 55  | 54.87         | 2.8 | ND   | UNMUT | POS   | 2   | FCR       | CR           | 167.57      | ALIVE  |
| CLL027 | F   | 53  | 33.54         | 3.9 | ND   | UNMUT | POS   | 4   | FCR       | CR           | 140.33      | ALIVE  |
| CLL028 | M   | 59  | 50.63         | 3.1 | ND   | UNMUT | NEG   | 3   | FCR       | NPR          | 147.7       | ALIVE  |
| CLL029 | M   | 64  | 19.15         | 3.9 | ND   | ND    | NEG   | 2   | FCR       | CR           | 119.8       | ALIVE  |
| CLL030 | F   | 60  | 14.13         | 5.8 | ND   | UNMUT | ND    | 1   | FCR       | CR           | 119.47      | ALIVE  |
| CLL031 | M   | 68  | 0.59          | 2.7 | ND   | MUT   | NEG   | 1   | FCR       | CR           | 106.87      | ALIVE  |
| CLL032 | F   | 40  | 52.80         | 2.5 | ND   | MUT   | NEG   | 2   | FCR       | CR           | 155.27      | ALIVE  |

Supplemental data – Ferrajoli, Shanafelt, Ivan et al

|        |   |    |        |     |      |       |     |   |      |     |        |       |
|--------|---|----|--------|-----|------|-------|-----|---|------|-----|--------|-------|
| CLL033 | M | 44 | 65.12  | 3.6 | ND   | MUT   | NEG | 2 | FCR  | CR  | 166.77 | ALIVE |
| CLL034 | F | 70 | 94.42  | 3.1 | ND   | MUT   | NEG | 4 | FCR  | PR  | 187.2  | ALIVE |
| CLL035 | F | 56 | 86.74  | 3.2 | ND   | UNMUT | POS | 1 | FCR  | CR  | 189.43 | ALIVE |
| CLL036 | M | 62 | 119.92 | 3.1 | ND   | MUT   | NEG | 2 | FCR  | CR  | 217.63 | ALIVE |
| CLL037 | M | 71 | 19.12  | 7.1 | ND   | UNMUT | NEG | 2 | FCR  | CR  | 97.73  | DEAD  |
| CLL038 | M | 51 | 4.47   | 3.5 | ND   | UNMUT | NEG | 1 | FCR  | CR  | 55.4   | DEAD  |
| CLL039 | M | 74 | 33.31  | 4.7 | ND   | UNMUT | NEG | 1 | FCR  | CR  | 125.07 | ALIVE |
| CLL040 | F | 69 | 20.07  | 4.6 | ND   | UNMUT | POS | 3 | FCR  | CR  | 114.63 | ALIVE |
| CLL041 | M | 55 | 63.24  | 1.7 | ND   | UNMUT | POS | 1 | FCR  | CR  | 160.33 | ALIVE |
| CLL042 | F | 58 | 24.02  | 4.3 | ND   | UNMUT | NEG | 2 | FCR  | CR  | 117.3  | ALIVE |
| CLL043 | M | 55 | 34.69  | 3.7 | ND   | UNMUT | POS | 2 | FCR  | CR  | 96.9   | DEAD  |
| CLL044 | M | 46 | 5.52   | 1.6 | ND   | UNMUT | POS | 1 | FCR  | CR  | 83.53  | ALIVE |
| CLL045 | M | 46 | 10.64  | 2.9 | ND   | UNMUT | POS | 2 | FCR  | CR  | 100.87 | ALIVE |
| CLL046 | M | 52 | 3.71   | 2   | ND   | UNMUT | POS | 1 | FCR  | CR  | 95.97  | ALIVE |
| CLL047 | M | 58 | 28.22  | 3.3 | ND   | MUT   | NEG | 1 | FCR  | CR  | 117.97 | ALIVE |
| CLL048 | M | 52 | 28.29  | 2.9 | ND   | UNMUT | NEG | 4 | FCR  | CR  | 109.8  | ALIVE |
| CLL049 | M | 27 | 1.64   | 3   | ND   | UNMUT | POS | 1 | FCR  | CR  | 72.2   | DEAD  |
| CLL050 | M | 40 | 0.95   | 4.8 | ND   | UNMUT | POS | 4 | FCR  | NR  | 90.43  | ALIVE |
| CLL051 | M | 74 | 57.92  | 7   | ND   | UNMUT | NEG | 2 | FCR  | NPR | 142.67 | ALIVE |
| CLL052 | M | 60 | 1.41   | 2.7 | ND   | UNMUT | POS | 2 | FCR  | CR  | 77.77  | DEAD  |
| CLL053 | M | 50 | 24.38  | 4.9 | ND   | MUT   | NEG | 4 | FCR  | CR  | 113.03 | ALIVE |
| CLL054 | M | 57 | 115.94 | 4.5 | ND   | MUT   | NEG | 3 | FCR  | CR  | 199.57 | ALIVE |
| CLL055 | F | 55 | 10.87  | 3.2 | ND   | UNMUT | POS | 3 | FCR  | NPR | 94.27  | ALIVE |
| CLL056 | M | 63 | 1.74   | 3.3 | ND   | UNMUT | NEG | 2 | FCR  | CR  | 88     | ALIVE |
| CLL057 | M | 38 | 95.97  | 2.3 | ND   | UNMUT | NEG | 2 | FCR  | CR  | 182.9  | ALIVE |
| CLL058 | M | 46 | 4.57   | 2.2 | ND   | MUT   | NEG | 2 | FCR  | NPR | 75.57  | ALIVE |
| CLL059 | M | 56 | 15.93  | 2.2 | ND   | MUT   | NEG | 4 | FCR  | CR  | 97.63  | ALIVE |
| CLL060 | F | 44 | 20.50  | 2.7 | ND   | UNMUT | NEG | 1 | FCR  | CR  | 85.83  | ALIVE |
| CLL061 | M | 70 | 1.12   | 5.9 | ND   | UNMUT | POS | 1 | FCR  | CR  | 62.6   | DEAD  |
| CLL062 | F | 65 | 21.68  | 3.3 | ND   | UNMUT | POS | 2 | FCR  | NR  | 41.97  | DEAD  |
| CLL063 | M | 58 | 42.38  | 4.1 | ND   | MUT   | NEG | 4 | FCR  | CR  | 115.63 | ALIVE |
| CLL064 | M | 71 | 102.97 | 3   | ND   | UNMUT | POS | 1 | FCR  | CR  | 181.43 | ALIVE |
| CLL065 | M | 75 | 64.62  | 7.4 | ND   | MUT   | POS | 2 | FCR  | CR  | 131.23 | ALIVE |
| CLL066 | M | 45 | 19.22  | 2.3 | ND   | MUT   | NEG | 1 | FCR  | CR  | 97.63  | ALIVE |
| CLL067 | M | 60 | 0.72   | 3.4 | 13q- | UNMUT | NEG | 2 | FCR3 | CR  | 74.67  | ALIVE |
| CLL068 | M | 44 | 119.82 | 5.1 | 11q- | UNMUT | POS | 3 | FCR3 | CR  | 193.8  | ALIVE |

Supplemental data – Ferrajoli, Shanafelt, Ivan et al

|        |   |    |       |     |       |       |     |   |                |     |        |       |
|--------|---|----|-------|-----|-------|-------|-----|---|----------------|-----|--------|-------|
| CLL069 | F | 73 | 51.94 | 2.2 | 17q-  | UNMUT | NEG | 3 | FCR            | CR  | 107.03 | DEAD  |
| CLL070 | F | 58 | 0.79  | 1.5 | ND    | MUT   | NEG | 1 | FCR            | PR  | 138.77 | ALIVE |
| CLL071 | F | 55 | 23.98 | 2.8 | 13q-  | UNMUT | POS | 1 | FCR OS         | CR  | 51.37  | ALIVE |
| CLL072 | F | 65 | 99.45 | 4.7 | NEG   | MUT   | NEG | 4 | FRONTLINE CFAR | PR  | 150.27 | ALIVE |
| CLL073 | M | 68 | 7.75  | 8.1 | TRI12 | MUT   | NEG | 4 | FRONTLINE CFAR | CR  | 59.9   | ALIVE |
| CLL074 | M | 55 | 2.23  | 2.3 | 13q-  | UNMUT | POS | 2 | FCR            | CR  | 52.07  | ALIVE |
| CLL075 | M | 66 | 4.11  | 5.1 | TRI12 | UNMUT | NEG | 2 | FRONTLINE CFAR | CR  | 56.73  | ALIVE |
| CLL076 | M | 53 | 10.18 | 2.9 | TRI12 | UNMUT | NEG | 0 | FRONTLINE CFAR | CR  | 23.2   | DEAD  |
| CLL077 | M | 64 | 14.06 | 2.5 | 17p-  | UNMUT | POS | 2 | FCR OS         | PR  | 34.67  | DEAD  |
| CLL078 | F | 55 | 1.28  | 2.9 | NEG   | UNMUT | NEG | 1 | FCR            | NPR | 54.13  | ALIVE |
| CLL079 | M | 47 | 0.69  | 1.9 | NEG   | UNMUT | POS | 2 | FCMR           | CR  | 49.77  | ALIVE |
| CLL080 | M | 48 | 72.18 | 5.3 | 11q-  | UNMUT | POS | 1 | FRONTLINE CFAR | CR  | 121.47 | ALIVE |
| CLL081 | M | 67 | 27.14 | 7   | 11q-  | UNMUT | NEG | 3 | FRONTLINE CFAR | CR  | 66.5   | DEAD  |
| CLL082 | M | 60 | 0.07  | 3.1 | NEG   | MUT   | POS | 2 | FCR OS         | CR  | 32.93  | ALIVE |
| CLL083 | M | 59 | 22.93 | 1.8 | NEG   | ND    | POS | 0 | FCR+GM         | CR  | 54.33  | ALIVE |
| CLL084 | F | 59 | 40.18 | 5.3 | 17p-  | UNMUT | POS | 3 | FRONTLINE CFAR | CR  | 90.5   | ALIVE |
| CLL085 | M | 60 | 12.85 | 1.3 | TRI12 | ND    | NEG | 1 | FCR+GM         | CR  | 44.4   | ALIVE |
| CLL086 | F | 49 | 8.80  | 3   | 13q-  | UNMUT | POS | 1 | FCR OS         | PR  | 59.1   | ALIVE |
| CLL087 | M | 54 | 8.44  | 2.3 | NEG   | UNMUT | NEG | 2 | FCR OS         | NPR | 55.17  | ALIVE |
| CLL088 | M | 51 | 2.00  | 2.5 | NEG   | MUT   | NEG | 4 | FCR OS         | CR  | 51.2   | ALIVE |
| CLL089 | M | 60 | 9.46  | 2.1 | 11q-  | UNMUT | POS | 2 | FCR+GM         | CR  | 52.63  | ALIVE |
| CLL090 | M | 44 | 2.30  | 2.6 | 11q-  | UNMUT | POS | 2 | FCR OS         | CR  | 46.53  | ALIVE |
| CLL091 | M | 60 | 28.62 | 4   | 11q-  | UNMUT | POS | 1 | FCR OS         | CR  | 74.27  | ALIVE |
| CLL092 | M | 65 | 22.60 | 5.3 | 11q-  | UNMUT | POS | 2 | FRONTLINE CFAR | CR  | 68.03  | ALIVE |
| CLL093 | M | 54 | 8.90  | 2.2 | 11q-  | UNMUT | POS | 1 | FCR+GM         | CR  | 56.6   | ALIVE |
| CLL094 | F | 39 | 1.58  | 2.6 | NEG   | UNMUT | POS | 1 | FCR+GM         | CR  | 41.47  | ALIVE |
| CLL095 | M | 55 | 15.21 | 3.7 | 13q-  | UNMUT | POS | 2 | FCR+GM         | CR  | 56.9   | ALIVE |
| CLL096 | M | 36 | 3.29  | 1.7 | 11q-  | UNMUT | POS | 1 | FCR+GM         | CR  | 47.07  | ALIVE |
| CLL097 | M | 52 | 2.17  | 3.2 | 11q-  | UNMUT | POS | 2 | FCR+GM         | CR  | 46.27  | ALIVE |
| CLL098 | M | 66 | 51.32 | 3.6 | 11q-  | UNMUT | NEG | 2 | FCR+GM         | CR  | 90.4   | ALIVE |
| CLL099 | M | 66 | 13.24 | 7.1 | TRI12 | UNMUT | POS | 3 | CFAR           | NPR | 55     | ALIVE |
| CLL100 | M | 65 | 72.77 | 2   | NEG   | UNMUT | NEG | 4 | FCR+GM         | CR  | 108.03 | DEAD  |
| CLL101 | M | 57 | 0.62  | 3.5 | 11q-  | UNMUT | POS | 1 | FCR+GM         | CR  | 40.47  | ALIVE |
| CLL102 | M | 43 | 0.99  | 2.3 | 11q-  | UNMUT | POS | 1 | FCR+GM         | PR  | 36.2   | ALIVE |
| CLL103 | F | 77 | 18.73 | 3.5 | 11q-  | UNMUT | NEG | 1 | FCR+GM         | CR  | 48.33  | ALIVE |
| CLL104 | M | 58 | 29.47 | 4.1 | 11q-  | UNMUT | POS | 1 | CFAR           | PR  | 70.17  | ALIVE |

Supplemental data – Ferrajoli, Shanafelt, Ivan et al

|        |   |    |        |      |       |       |     |   |        |     |        |       |
|--------|---|----|--------|------|-------|-------|-----|---|--------|-----|--------|-------|
| CLL105 | M | 50 | 2.43   | 4    | 13q-  | UNMUT | POS | 2 | CFAR   | CR  | 36.3   | ALIVE |
| CLL106 | M | 45 | 1.31   | 2    | NEG   | MUT   | NEG | 2 | FCR+GM | CR  | 38.37  | ALIVE |
| CLL107 | M | 55 | 23.49  | 2.9  | NEG   | MUT   | NEG | 2 | FCR+GM | CR  | 62.37  | DEAD  |
| CLL108 | M | 61 | 3.38   | 2.7  | TRI12 | MUT   | NEG | 1 | FCR+GM | CR  | 31.87  | ALIVE |
| CLL109 | M | 48 | 32.56  | 7    | NEG   | MUT   | POS | 1 | CFAR   | NPR | 61.83  | ALIVE |
| CLL110 | M | 54 | 1.54   | 6    | 13q-  | MUT   | NEG | 4 | CFAR   | CR  | 37.03  | ALIVE |
| CLL111 | F | 43 | 39.82  | 3.5  | NEG   | MUT   | NEG | 1 | FCR+GM | CR  | 62.53  | ALIVE |
| CLL112 | M | 51 | 1.84   | 7.8  | 17p-  | UNMUT | NEG | 3 | CFAR   | CR  | 36.13  | ALIVE |
| CLL113 | M | 69 | 41.23  | 4.4  | 13q-  | MUT   | NEG | 3 | FCR OS | CR  | 72.77  | ALIVE |
| CLL114 | M | 51 | 0.79   | 3.6  | NEG   | UNMUT | POS | 1 | FCR OS | CR  | 30.9   | ALIVE |
| CLL115 | M | 63 | 2.69   | 7.3  | 17p-  | NR    | POS | 2 | CFAR   | CR  | 36.53  | ALIVE |
| CLL116 | M | 61 | 56.61  | 5.7  | 11q-  | UNMUT | NEG | 2 | CFAR   | CR  | 84.97  | ALIVE |
| CLL117 | F | 66 | 55.95  | 3.5  | 11q-  | UNMUT | POS | 1 | FCR+GM | CR  | 82.93  | ALIVE |
| CLL118 | M | 51 | 1.28   | 10.3 | NEG   | ND    | NEG | 4 | FCR OS | PR  | 28.77  | ALIVE |
| CLL119 | F | 56 | 16.53  | 3.2  | NEG   | UNMUT | POS | 3 | FCR+GM | CR  | 38.17  | ALIVE |
| CLL120 | M | 49 | 31.87  | 2.9  | TRI12 | UNMUT | NEG | 2 | FCR+GM | CR  | 60.27  | ALIVE |
| CLL121 | M | 59 | 190.49 | 7.9  | NEG   | UNMUT | POS | 2 | CFAR   | PR  | 223.06 | ALIVE |
| CLL122 | M | 61 | 17.45  | 3.9  | 11q-  | NR    | POS | 1 | FCR OS | CR  | 43.43  | ALIVE |
| CLL123 | M | 46 | 2.30   | 4.7  | TRI12 | UNMUT | POS | 2 | CFAR   | CR  | 31.93  | ALIVE |
| CLL124 | M | 59 | 48.95  | 2.7  | ND    | UNMUT | POS | 3 | FCR    | CR  | 61.67  | ALIVE |
| CLL125 | F | 60 | 3.75   | 2.5  | ND    | UNMUT | NEG | 1 | FCR    | CR  | 23.67  | ALIVE |
| CLL126 | M | 63 | 68.44  | 3.5  | 13q-  | UNMUT | POS | 2 | FCR    | PR  | 84.27  | ALIVE |
| CLL127 | F | 65 | 169.40 | 3.6  | 13q-  | UNMUT | POS | 2 | FCR    | PR  | 184.43 | ALIVE |
| CLL128 | M | 50 | 2.33   | 3.7  | 11q-  | UNMUT | POS | 1 | FCR    | CR  | 15.6   | ALIVE |
| CLL129 | M | 66 | 46.65  | 5.8  | 11q-  | UNMUT | NEG | 1 | FCR    | CR  | 60.27  | ALIVE |
| CLL130 | F | 57 | 94.55  | 4.2  | 13q-  | UNMUT | POS | 2 | FCR    | NPR | 111.87 | ALIVE |
| CLL131 | M | 74 | 34.69  | 3.3  | 11q-  | UNMUT | POS | 4 | FCR    | PR  | 47.47  | ALIVE |
| CLL132 | M | 68 | 33.05  | 4.1  | 11q-  | UNMUT | POS | 1 | FCR    | CR  | 45.03  | ALIVE |
| CLL133 | M | 49 | 1.54   | 2.2  | 13q-  | MUT   | POS | 1 | FCR    | CR  | 14.97  | ALIVE |
| CLL134 | F | 73 | 39.33  | 3.1  | TRI12 | UNMUT | POS | 2 | FCR    | CR  | 50.5   | ALIVE |
| CLL135 | M | 39 | 65.35  | 5.3  | ND    | UNMUT | POS | 4 | FCR    | NR  | 85.93  | DEAD  |
| CLL136 | F | 66 | 11.53  | 7.4  | 17p-  | UNMUT | NEG | 2 | FCR OS | PR  | 41.27  | DEAD  |
| CLL137 | M | 60 | 3.12   | 4.8  | 13q-  | UNMUT | POS | 2 | CFAR   | CR  | 46.2   | ALIVE |
| CLL138 | M | 46 | 6.24   | 1.9  | NEG   | UNMUT | POS | 0 | FCR    | CR  | 33.27  | ALIVE |
| CLL139 | M | 46 | 56.15  | 5.7  | 13q-  | UNMUT | POS | 4 | FCR OS | CR  | 70.9   | ALIVE |
| CLL140 | M | 63 | 2.10   | 4    | 11q-  | UNMUT | NEG | 1 | FCR    | CR  | 20.57  | ALIVE |

Supplemental data – Ferrajoli, Shanafelt, Ivan et al

|        |   |      |        |     |       |       |     |   |                                  |    |         |       |
|--------|---|------|--------|-----|-------|-------|-----|---|----------------------------------|----|---------|-------|
| CLL141 | M | 52   | 0.66   | 4.1 | 11q-  | UNMUT | POS | 2 | FCR                              | CR | 14.93   | ALIVE |
| CLL142 | M | 54   | 2.23   | 4.4 | 17p-  | UNMUT | POS | 2 | FCR                              | NR | 17.37   | ALIVE |
| CLL143 | M | 62   | 8.15   | 2.4 | NEG   | UNMUT | NEG | 1 | FCR                              | CR | 19.17   | ALIVE |
| CLL144 | M | 49.6 | 1.02   | 2.3 | 13q-  | MUT   | NEG | 2 | FR (5 cycles)                    | CR | 68.5339 | ALIVE |
| CLL145 | M | 61.3 | 57.03  | 3.1 | ND    | UNMUT | POS | 4 | FCR (CR initially, then MRD)     | CR | 86.4394 | DEAD  |
| CLL146 | M | 40   | 26.55  | ND  | NEG   | MUT   | NEG | 2 | FCR (6 cycles) - no MRD in BM    | CR | 109.405 | ALIVE |
| CLL147 | M | 58   | 33.97  | ND  | NEG   | UNMUT | POS | 4 | FR (6 cycles)                    | CR | 99.5811 | ALIVE |
| CLL148 | F | 45   | 18.43  | 2.2 | TRI12 | UNMUT | POS | 2 | FCR (6 cycles)                   | CR | 98.7598 | ALIVE |
| CLL149 | M | 45.7 | 43.96  | 1.3 | NEG   | UNMUT | NEG | 4 | FCR (6 cycles)                   | CR | 93.1417 | ALIVE |
| CLL150 | M | 47   | 22.01  | 1.5 | 13q-  | MUT   | NEG | 2 | FR (6 cycles)                    | CR | 79.8029 | ALIVE |
| CLL151 | M | 56.1 | 16.07  | 2.3 | TRI12 | UNMUT | POS | 2 | FCR (6 cycles) - <0.1% MRD       | CR | 79.8686 | ALIVE |
| CLL152 | F | 61.3 | 50.46  | 3.8 | 13q-  | MUT   | NEG | 2 | FR (6 cycles)                    | CR | 64.8542 | ALIVE |
| CLL153 | M | 52   | 0.00   | 2   | 13q-  | MUT   | NEG | 4 | FR (5 cycles) - NO MRD (4/07)    | CR | 62.5544 | ALIVE |
| CLL154 | F | 73   | 21.42  | ND  | ND    | UNMUT | NEG | 2 | FR                               | CR | 16.7885 | ALIVE |
| CLL155 | M | 52.6 | 252.48 | 2.3 | NEG   | MUT   | NEG | 2 | FCR                              | CR | 65.117  | ALIVE |
| CLL156 | M | 70.1 | 42.74  | ND  | ND    | MUT   | NEG | 4 | FCR (6 cycles)                   | NR | 111.409 | DEAD  |
| CLL157 | M | 48.2 | 29.01  | 4   | NEG   | UNMUT | POS | 2 | FR (F refractory after 2 cycles) | NR | 75.2361 | DEAD  |
| CLL158 | M | 73.6 | 94.98  | 4.3 | 13q-  | MUT   | NEG | 4 | FC                               | NR | 22.9651 | DEAD  |
| CLL159 | M | 67.2 | 4.96   | 2.8 | NEG   | ND    | POS | 2 | FR (6 cycles)                    | NR | 32.23   | DEAD  |
| CLL160 | F | 72.4 | 3.55   | ND  | 17p-  | UNMUT | NEG | 3 | Fludarabine + Cytosan            | NR | 2.98973 | ALIVE |
| CLL161 | M | 48.3 | 7.26   | ND  | NEG   | UNMUT | POS | 1 | FCR (6 cycles)                   | PR | 65.577  | ALIVE |
| CLL162 | M | 59.9 | 9.40   | ND  | TRI12 | UNMUT | POS | 2 | Fludarabine                      | PR | 61.6016 | DEAD  |
| CLL163 | M | 57.8 | 24.84  | ND  | ND    | ND    | ND  | 3 | Fludarabine + cyclophosphamide   | PR | 28.5175 | DEAD  |
| CLL164 | F | 52.9 | 71.66  | ND  | ND    | ND    | ND  | 2 | FR (2 cycles) - good response    | PR | 83.4497 | ALIVE |
| CLL165 | F | 61.8 | 30.00  | 2.2 | NEG   | UNMUT | POS | 3 | HDMP + R frontline               | PR | 95.2115 | ALIVE |
| CLL166 | M | 64.9 | 23.26  | 2.3 | 11q-  | MUT   | NEG | 3 | FR (6 cycles)                    | PR | 81.807  | DEAD  |
| CLL167 | F | 49.8 | 50.07  | 2.6 | ND    | UNMUT | POS | 2 | FR (6 cycles) - MRD BM 4/04      | PR | 86.2423 | ALIVE |
| CLL168 | F | 77.5 | 20.93  | 2.9 | TRI12 | UNMUT | POS | 2 | Ritux + low-dose glucorticoids   | PR | 38.3409 | DEAD  |
| CLL169 | M | 68.2 | 25.92  | 1.5 | 11q-  | UNMUT | POS | 4 | FR                               | PR | 69.2895 | DEAD  |
| CLL170 | F | 58.8 | 19.25  | 3   | TRI12 | UNMUT | NEG | 4 | FCR (6 cycles) - MRD (8/05)      | PR | 69.5524 | DEAD  |
| CLL171 | M | 72.2 | 68.01  | 2.9 | 13q-  | MUT   | NEG | 2 | FR                               | PR | 66.0041 | ALIVE |
| CLL172 | M | 56.9 | 139.04 | 1.9 | 13q-  | MUT   | NEG | 2 | Fludarabine + Ritux              | PR | 54.7351 | ALIVE |
| CLL173 | F | 70   | 16.53  | 2.7 | TRI12 | MUT   | NEG | 3 | FR                               | PR | 26.6776 | ALIVE |
| CLL174 | F | 42.4 | 0.00   | ND  | 13q-  | UNMUT | POS | 4 | FCR                              | PR | 5.28953 | ALIVE |
| CLL175 | M | 67   | 49.81  | 1.6 | NEG   | NR    | ND  | 1 | Lenalidomide A                   | CR | 78.17   | DEAD  |
| CLL176 | M | 70   | 142.46 | 4.7 | ND    | UNMUT | ND  | 4 | Lenalidomide A                   | CR | 192.67  | ALIVE |



Supplemental data – Ferrajoli, Shanafelt, Ivan et al

|        |   |    |        |      |       |       |     |   |                |     |         |       |
|--------|---|----|--------|------|-------|-------|-----|---|----------------|-----|---------|-------|
| CLL177 | M | 33 | 80.07  | 3.6  | 11q-  | UNMUT | POS | 1 | Lenalidomide A | MR  | 98.8    | DEAD  |
| CLL178 | M | 49 | 119.95 | 2.3  | 11q-  | UNMUT | ND  | 3 | Lenalidomide A | MR  | 145.83  | DEAD  |
| CLL179 | F | 62 | 196.83 | 8.2  | 11q-  | UNMUT | POS | 4 | Lenalidomide A | MR  | 201.03  | DEAD  |
| CLL180 | F | 70 | 127.80 | 3.4  | 17p-  | MUT   | NEG | 4 | Lenalidomide A | MR  | 177.87  | ALIVE |
| CLL181 | M | 63 | 102.14 | 5.2  | 11q-  | UNMUT | POS | 4 | Lenalidomide A | MR  | 120.03  | DEAD  |
| CLL182 | M | 57 | 63.15  | 2.9  | TRI12 | UNMUT | POS | 1 | Lenalidomide A | MR  | 108.1   | ALIVE |
| CLL183 | F | 82 | 215.79 | 10.1 | 11q-  | UNMUT | ND  | 3 | Lenalidomide A | NR  | 284.43  | DEAD  |
| CLL184 | M | 57 | 159.41 | 5.5  | 13q-  | UNMUT | ND  | 4 | Lenalidomide A | NR  | 165.93  | DEAD  |
| CLL185 | M | 77 | 117.59 | 7.6  | 17p-  | UNMUT | POS | 2 | Lenalidomide A | NR  | 143.53  | DEAD  |
| CLL186 | M | 64 | 172.98 | 3.9  | 11q-  | UNMUT | POS | 2 | Lenalidomide A | NR  | 228.37  | ALIVE |
| CLL187 | M | 56 | 35.48  | 2.2  | TRI12 | UNMUT | ND  | 4 | Lenalidomide A | NR  | 89.97   | ALIVE |
| CLL188 | F | 59 | 53.03  | 5    | NEG   | UNMUT | POS | 2 | Lenalidomide A | NR  | 67.7    | DEAD  |
| CLL189 | M | 65 | 22.05  | 4.1  | 11q-  | UNMUT | POS | 3 | Lenalidomide A | NR  | 66.57   | DEAD  |
| CLL190 | F | 69 | 62.00  | 4.6  | TRI12 | UNMUT | ND  | 3 | Lenalidomide A | NR  | 112.27  | ALIVE |
| CLL191 | M | 53 | 58.78  | 2.2  | 11q-  | UNMUT | POS | 1 | Lenalidomide A | NR  | 104.13  | ALIVE |
| CLL192 | M | 59 | 144.26 | 8.5  | 11q-  | NR    | POS | 1 | Lenalidomide A | NR  | 166.7   | DEAD  |
| CLL193 | F | 69 | 77.47  | 5.6  | 17p-  | UNMUT | POS | 4 | Lenalidomide A | NR  | 79.93   | DEAD  |
| CLL194 | M | 67 | 60.19  | 6.3  | TRI12 | UNMUT | POS | 2 | Lenalidomide A | NR  | 66.37   | DEAD  |
| CLL195 | M | 69 | 108.42 | 9.4  | ND    | UNMUT | POS | 4 | Lenalidomide A | PR  | 116.27  | DEAD  |
| CLL196 | M | 62 | 91.01  | 3.6  | ND    | UNMUT | ND  | 1 | Lenalidomide A | PR  | 113.23  | DEAD  |
| CLL197 | M | 72 | 91.99  | 3.4  | TRI12 | MUT   | ND  | 2 | Lenalidomide A | PR  | 105.93  | DEAD  |
| CLL198 | M | 70 | 96.43  | 6.4  | 11q-  | UNMUT | ND  | 2 | Lenalidomide A | PR  | 114.17  | DEAD  |
| CLL199 | M | 59 | 83.48  | 4.7  | 11q-  | UNMUT | POS | 1 | Lenalidomide A | PR  | 136.63  | ALIVE |
| CLL200 | M | 56 | 139.07 | 4.9  | 11q-  | UNMUT | POS | 1 | Lenalidomide A | CR  | 159.23  | DEAD  |
| CLL201 | M | 70 | 100.30 | 7.1  | NEG   | MUT   | POS | 3 | Lenalidomide A | PR  | 110.67  | DEAD  |
| CLL202 | M | 82 | 77.01  | 4.3  | TRI12 | UNMUT | NEG | 2 | Lenalidomide A | PR  | 35.1934 | ALIVE |
| CLL203 | M | 73 | 58.25  | 3    | 13q-  | UNMUT | NEG | 1 | Lenalidomide B | PR  | 26.7984 | ALIVE |
| CLL204 | F | 67 | 53.72  | 2.9  | 13q-  | UNMUT | POS | 3 | Lenalidomide B | PR  | 33.4156 | ALIVE |
| CLL205 | F | 67 | 164.07 | 3.2  | 13q-  | UNMUT | NEG | 2 | Lenalidomide B | PR  | 32.0329 | ALIVE |
| CLL206 | M | 85 | 65.15  | 6.1  | NEG   | UNMUT | POS | 1 | Lenalidomide B | PR  | 34.2058 | ALIVE |
| CLL207 | F | 66 | 29.86  | 4.5  | TRI12 | UNMUT | NEG | 1 | Lenalidomide B | PR  | 29.7942 | ALIVE |
| CLL208 | M | 73 | 4.53   | 6.3  | 13q-  | UNMUT | POS | 2 | Lenalidomide B | CR  | 35.8848 | ALIVE |
| CLL209 | M | 72 | 13.57  | 4.3  | TRI12 | UNMUT | NEG | 1 | Lenalidomide B | CR  | 24.8889 | ALIVE |
| CLL210 | M | 67 | 29.93  | 3.6  | 11q-  | UNMUT | NEG | 1 | Lenalidomide B | CR  | 30.4527 | ALIVE |
| CLL211 | F | 76 | 17.91  | 4.2  | NEG   | MUT   | POS | 4 | Lenalidomide B | NPR | 31.7695 | ALIVE |
| CLL212 | F | 82 | 75.70  | 2.1  | 13q-  | MUT   | NEG | 4 | Lenalidomide B | PR  | 35.2593 | ALIVE |

Supplemental data – Ferrajoli, Shanafelt, Ivan et al

|               |   |    |        |      |       |       |     |   |                |     |         |       |
|---------------|---|----|--------|------|-------|-------|-----|---|----------------|-----|---------|-------|
| <b>CLL213</b> | F | 68 | 82.86  | 3.1  | 11q-  | UNMUT | POS | 1 | Lenalidomide B | CR  | 30.321  | ALIVE |
| <b>CLL214</b> | M | 71 | 105.33 | 3.1  | 13q-  | MUT   | ND  | 4 | Lenalidomide B | MR  | 19.9506 | ALIVE |
| <b>CLL215</b> | F | 69 | 45.08  | 3.9  | TRI12 | MUT   | NEG | 2 | Lenalidomide B | NPR | 30.716  | ALIVE |
| <b>CLL216</b> | F | 68 | 123.50 | 3.9  | TRI12 | MUT   | NEG | 1 | Lenalidomide B | PR  | 24.8889 | ALIVE |
| <b>CLL217</b> | M | 74 | 93.77  | 6    | 13q-  | UNMUT | ND  | 1 | Lenalidomide B | NPR | 28.4444 | ALIVE |
| <b>CLL218</b> | M | 70 | 38.64  | 2.5  | 11q-  | UNMUT | POS | 1 | Lenalidomide B | PR  | 32.3292 | ALIVE |
| <b>CLL219</b> | M | 66 | 70.90  | 4.2  | NEG   | UNMUT | POS | 2 | Lenalidomide B | PR  | 24.6914 | ALIVE |
| <b>CLL220</b> | F | 67 | 52.44  | 7.2  | 11q-  | UNMUT | NEG | 3 | Lenalidomide B | MR  | 26.3045 | ALIVE |
| <b>CLL221</b> | M | 72 | 202.45 | 10.2 | 11q-  | NR    | NEG | 1 | Lenalidomide B | NR  | 19.9177 | DEAD  |
| <b>CLL222</b> | F | 68 | 7.79   | 3.2  | TRI12 | MUT   | NEG | 1 | Lenalidomide B | PR  | 23.2757 | ALIVE |
| <b>CLL223</b> | M | 68 | 21.85  | 2.8  | NEG   | UNMUT | POS | 1 | Lenalidomide B | NPR | 28.642  | ALIVE |
| <b>CLL224</b> | M | 66 | 117.29 | 4.9  | TRI12 | UNMUT | NEG | 2 | Lenalidomide B | MR  | 27.6872 | ALIVE |
| <b>CLL225</b> | F | 72 | 130.69 | 3.8  | 13q-  | MUT   | NEG | 2 | Lenalidomide B | MR  | 33.9424 | ALIVE |
| <b>CLL226</b> | F | 77 | 11.96  | 6.9  | 17p-  | NR    | POS | 2 | Lenalidomide B | NR  | 24.0658 | DEAD  |
| <b>CLL227</b> | M | 72 | 62.75  | 4.5  | 13q-  | UNMUT | POS | 0 | Lenalidomide B | NPR | 33.4486 | ALIVE |
| <b>CLL228</b> | M | 79 | 71.26  | 5.4  | 11q-  | UNMUT | ND  | 1 | Lenalidomide B | NPR | 27.1276 | ALIVE |

TTFT = time from diagnosis to first treatment; FISH = fluorescence in situ hybridization; VH = IgHV mutation status; RAI = highest Rai stage; OS = overall survival; ND = not done; FCR = fludarabine, cyclophosphamide, and rituximab; Lenalidomide A = lenalidomide single agent as salvage therapy; Lenalidomide B = lenalidomide single agent as initial therapy.

**Supplementary Table 3. miRNA expression in patient samples from groups A and B (raw data).**

| Samples from individuals with monoclonal B-cell lymphocytosis (MBL) |         |             |                     |         |             |                     |         |             |                     |         |             |                     |
|---------------------------------------------------------------------|---------|-------------|---------------------|---------|-------------|---------------------|---------|-------------|---------------------|---------|-------------|---------------------|
| ID                                                                  | miR-155 |             |                     | miR-15a |             |                     | miR-16  |             |                     | miR-21  |             |                     |
|                                                                     | 5S rRNA | $\Delta$ Ct | Relative expression | 5S rRNA | $\Delta$ Ct | Relative expression | 5S rRNA | $\Delta$ Ct | Relative expression | 5S rRNA | $\Delta$ Ct | Relative expression |
| MBL 001                                                             | 18.1    | 6.36        | 0.012               | 18.1    | 11.73       | 0                   | 18.1    | 3.07        | 0.119               | 18.1    | 4.89        | 0.034               |
| MBL 002                                                             | 21.1    | 4.1         | 0.058               | 21.1    | 8.28        | 0.003               | 21.1    | 0           | 1                   | 21.1    | 2.08        | 0.237               |
| MBL 003                                                             | 20.26   | 4.91        | 0.033               | 20.26   | 10.02       | 0.001               | 20.26   | 1.43        | 0.372               | 20.26   | 4.18        | 0.055               |
| MBL 004                                                             | 20.43   | 4.54        | 0.043               | 20.43   | 10.02       | 0.001               | 20.43   | 1.75        | 0.297               | 20.43   | 3.13        | 0.115               |
| MBL 005                                                             | 20.09   | 3.16        | 0.112               | 20.09   | 7.75        | 0.005               | 20.09   | 0.88        | 0.544               | 20.09   | 2.19        | 0.219               |
| MBL 006                                                             | 20.06   | 4.86        | 0.035               | 20.06   | 8.8         | 0.002               | 20.06   | 1.31        | 0.402               | 20.06   | 3.36        | 0.097               |
| MBL 007                                                             | 19.49   | 6.06        | 0.015               | 19.49   | 9.4         | 0.001               | 19.49   | 2.3         | 0.202               | 19.49   | 4.31        | 0.051               |
| MBL 008                                                             | 20.6    | 2.28        | 0.206               | 20.6    | 9.51        | 0.001               | 20.6    | 2.06        | 0.239               | 20.6    | 2.31        | 0.202               |
| MBL 009                                                             | 21.21   | 2.18        | 0.22                | 21.21   | 6.37        | 0.012               | 21.21   | -0.44       | 1.357               | 21.21   | 1.51        | 0.351               |
| MBL 010                                                             | 19.15   | 4.35        | 0.049               | 19.15   | 9.36        | 0.002               | 19.15   | 1.91        | 0.267               | 19.15   | 4.09        | 0.059               |
| MBL 011                                                             | 19.72   | 3.98        | 0.064               | 19.72   | 7.58        | 0.005               | 19.72   | 0.59        | 0.663               | 19.72   | 2.65        | 0.159               |
| MBL 012                                                             | 19.39   | 4.29        | 0.051               | 19.39   | 8.92        | 0.002               | 19.39   | 2.06        | 0.239               | 19.39   | 3.15        | 0.112               |
| MBL 013                                                             | 19.67   | 4.71        | 0.038               | 19.67   | 10.23       | 0.001               | 19.67   | 2.86        | 0.137               | 19.67   | 4.49        | 0.044               |
| MBL 014                                                             | 19.5    | 4.5         | 0.044               | 19.5    | 8.94        | 0.002               | 19.5    | 2.35        | 0.197               | 19.5    | 2.94        | 0.131               |
| MBL 015                                                             | 21.03   | 3.07        | 0.119               | 21.03   | 7.75        | 0.005               | 21.03   | 0.37        | 0.771               | 21.03   | 2.94        | 0.13                |
| MBL 016                                                             | 20.83   | 3.19        | 0.109               | 20.83   | 7.39        | 0.006               | 20.83   | 0.24        | 0.847               | 20.83   | 1.84        | 0.28                |
| MBL 017                                                             | 20.06   | 3.7         | 0.077               | 20.06   | 8.78        | 0.002               | 20.06   | 1.74        | 0.299               | 20.06   | 2.94        | 0.131               |
| MBL 018                                                             | 20.16   | 4.05        | 0.06                | 20.16   | 8.15        | 0.004               | 20.16   | 1.19        | 0.438               | 20.16   | 2.95        | 0.129               |
| MBL 019                                                             | 19.88   | 4.21        | 0.054               | 19.88   | 9.4         | 0.001               | 19.88   | 2.11        | 0.232               | 19.88   | 3.65        | 0.08                |
| MBL 020                                                             | 18.92   | 3.23        | 0.106               | 18.92   | 10.57       | 0.001               | 18.92   | 3.2         | 0.109               | 18.92   | 3.75        | 0.074               |
| MBL 021                                                             | 18.31   | 2.89        | 0.135               | 18.31   | 8.31        | 0.003               | 18.31   | 1.7         | 0.307               | 18.31   | 2.73        | 0.151               |
| MBL 022                                                             | 18.14   | 4.01        | 0.062               | 18.14   | 9.09        | 0.002               | 18.14   | 2.06        | 0.239               | 18.14   | 3.84        | 0.07                |
| MBL 023                                                             | 18.9    | 5.59        | 0.021               | 18.9    | 9.77        | 0.001               | 18.9    | 2.31        | 0.201               | 18.9    | 4.9         | 0.034               |
| MBL 024                                                             | 18.24   | 5.56        | 0.021               | 18.24   | 9.01        | 0.002               | 18.24   | 2.12        | 0.231               | 18.24   | 3.3         | 0.102               |
| MBL 025                                                             | 18.7    | 5.74        | 0.019               | 18.7    | 9.99        | 0.001               | 18.7    | 2.95        | 0.129               | 18.7    | 4.65        | 0.04                |
| MBL 026                                                             | 18.32   | 5.67        | 0.02                | 18.32   | 9.91        | 0.001               | 18.32   | 3.13        | 0.114               | 18.32   | 4.21        | 0.054               |
| MBL 027                                                             | 18.01   | 7.22        | 0.007               | 18.01   | 9.76        | 0.001               | 18.01   | 2.36        | 0.195               | 18.01   | 5.14        | 0.028               |
| MBL 028                                                             | 18.06   | 6.02        | 0.015               | 18.06   | 9.31        | 0.002               | 18.06   | 2.47        | 0.181               | 18.06   | 3.87        | 0.068               |
| MBL 029                                                             | 21.8    | 7.59        | 0.005               | 21.8    | 12.37       | 0                   | 21.8    | 5.7         | 0.019               | 21.8    | 7.41        | 0.006               |
| MBL 030                                                             | 18.69   | 5.73        | 0.019               | 18.69   | 10.11       | 0.001               | 18.69   | 2.73        | 0.15                | 18.69   | 4.59        | 0.041               |
| MBL 031                                                             | 19.47   | 4.53        | 0.043               | 19.47   | 8.76        | 0.002               | 19.47   | 1.78        | 0.291               | 19.47   | 3.52        | 0.087               |
| MBL 032                                                             | 18.6    | 4.2         | 0.054               | 18.6    | 8.73        | 0.002               | 18.6    | 0.82        | 0.565               | 18.6    | 3.82        | 0.071               |
| MBL 033                                                             | 18.64   | 6.67        | 0.01                | 18.64   | 9.12        | 0.002               | 18.64   | 2.43        | 0.186               | 18.64   | 4.74        | 0.037               |

Supplemental data – Ferrajoli, Shanafelt, Ivan et al

|                |       |      |       |       |       |       |       |      |       |       |       |       |
|----------------|-------|------|-------|-------|-------|-------|-------|------|-------|-------|-------|-------|
| <b>MBL 034</b> | 20.61 | 8.21 | 0.003 | 20.61 | 13.76 | 0     | 20.61 | 6.54 | 0.011 | 20.61 | 8.97  | 0.002 |
| <b>MBL 035</b> | 18.27 | 5.62 | 0.02  | 18.27 | 9.28  | 0.002 | 18.27 | 2.56 | 0.17  | 18.27 | 4.71  | 0.038 |
| <b>MBL 036</b> | 18.69 | 6.53 | 0.011 | 18.69 | 9.59  | 0.001 | 18.69 | 2.62 | 0.163 | 18.69 | 4.15  | 0.056 |
| <b>MBL 037</b> | 19.07 | 5.12 | 0.029 | 19.07 | 10    | 0.001 | 19.07 | 3.15 | 0.113 | 19.07 | 3.75  | 0.075 |
| <b>MBL 038</b> | 21.39 | 4.46 | 0.045 | 21.39 | 11.07 | 0     | 21.39 | 3.75 | 0.074 | 21.39 | 5.5   | 0.022 |
| <b>MBL 039</b> | 19.02 | 4.74 | 0.037 | 19.02 | 8.8   | 0.002 | 19.02 | 2.02 | 0.246 | 19.02 | 3.25  | 0.105 |
| <b>MBL 040</b> | 18.59 | 4.15 | 0.056 | 18.59 | 8.9   | 0.002 | 18.59 | 2.13 | 0.229 | 18.59 | 3.42  | 0.093 |
| <b>MBL 041</b> | 18.06 | 6.2  | 0.014 | 18.06 | 9.94  | 0.001 | 18.06 | 2.89 | 0.135 | 18.06 | 4.65  | 0.04  |
| <b>MBL 042</b> | 18.89 | 4.69 | 0.039 | 18.89 | 8.8   | 0.002 | 18.89 | 2.31 | 0.202 | 18.89 | 3.75  | 0.074 |
| <b>MBL 043</b> | 19.2  | 4.04 | 0.061 | 19.2  | 8.9   | 0.002 | 19.2  | 1.75 | 0.297 | 19.2  | 3.51  | 0.088 |
| <b>MBL 044</b> | 19.09 | 4.3  | 0.051 | 19.09 | 9.95  | 0.001 | 19.09 | 3.07 | 0.119 | 19.09 | 3.48  | 0.089 |
| <b>MBL 045</b> | 18.79 | 2.78 | 0.146 | 18.79 | 8.05  | 0.004 | 18.79 | 1.09 | 0.468 | 18.79 | 3.02  | 0.123 |
| <b>MBL 046</b> | 18.49 | 6.16 | 0.014 | 18.49 | 8.69  | 0.002 | 18.49 | 2.11 | 0.231 | 18.49 | 3.98  | 0.063 |
| <b>MBL 047</b> | 20.06 | 6.29 | 0.013 | 20.06 | 9.74  | 0.001 | 20.06 | 2.73 | 0.151 | 20.06 | 5.06  | 0.03  |
| <b>MBL 048</b> | 18.9  | 7.21 | 0.007 | 18.9  | 9.72  | 0.001 | 18.9  | 2.52 | 0.174 | 18.9  | 4.59  | 0.042 |
| <b>MBL 049</b> | 20.02 | 6.55 | 0.011 | 20.02 | 9.26  | 0.002 | 20.02 | 2.02 | 0.247 | 20.02 | 4.87  | 0.034 |
| <b>MBL 050</b> | 19.04 | 4.81 | 0.036 | 19.04 | 8.8   | 0.002 | 19.04 | 2.42 | 0.186 | 19.04 | 2.65  | 0.159 |
| <b>MBL 051</b> | 19.48 | 4.37 | 0.048 | 19.48 | 8.56  | 0.003 | 19.48 | 1.06 | 0.479 | 19.48 | 3.5   | 0.088 |
| <b>MBL 052</b> | 19.22 | 5.47 | 0.023 | 19.22 | 8.8   | 0.002 | 19.22 | 1.77 | 0.293 | 19.22 | 4.18  | 0.055 |
| <b>MBL 053</b> | 19.16 | 5.2  | 0.027 | 19.16 | 9.56  | 0.001 | 19.16 | 2.61 | 0.164 | 19.16 | 3.45  | 0.091 |
| <b>MBL 054</b> | 19.13 | 4.06 | 0.06  | 19.13 | 8.98  | 0.002 | 19.13 | 1.88 | 0.271 | 19.13 | 4.42  | 0.047 |
| <b>MBL 055</b> | 19.07 | 4.36 | 0.049 | 19.07 | 9.25  | 0.002 | 19.07 | 1.82 | 0.284 | 19.07 | 3.76  | 0.074 |
| <b>MBL 056</b> | 18.16 | 5.02 | 0.031 | 18.16 | 8.99  | 0.002 | 18.16 | 2.1  | 0.233 | 18.16 | 3.73  | 0.076 |
| <b>MBL 057</b> | 19.71 | 3.09 | 0.117 | 19.71 | 8.35  | 0.003 | 19.71 | 0.87 | 0.547 | 19.71 | 2.83  | 0.14  |
| <b>MBL 058</b> | 19.11 | 5.45 | 0.023 | 19.11 | 9.15  | 0.002 | 19.11 | 2.18 | 0.221 | 19.11 | 4.04  | 0.061 |
| <b>MBL 059</b> | 19.24 | 3.99 | 0.063 | 19.24 | 9.37  | 0.002 | 19.24 | 2.23 | 0.212 | 19.24 | 4.18  | 0.055 |
| <b>MBL 060</b> | 20.05 | 5.6  | 0.021 | 20.05 | 7.86  | 0.004 | 20.05 | 0.52 | 0.695 | 20.05 | 3.23  | 0.106 |
| <b>MBL 061</b> | 19.36 | 5.3  | 0.025 | 19.36 | 8.7   | 0.002 | 19.36 | 1.76 | 0.295 | 19.36 | 3.6   | 0.083 |
| <b>MBL 062</b> | 20.38 | 4.21 | 0.054 | 20.38 | 10.8  | 0.001 | 20.38 | 3.21 | 0.108 | 20.38 | 5.4   | 0.024 |
| <b>MBL 063</b> | 19.17 | 6.52 | 0.011 | 19.17 | 10.34 | 0.001 | 19.17 | 3.24 | 0.106 | 19.17 | 5.17  | 0.028 |
| <b>MBL 064</b> | 19.5  | 4.89 | 0.034 | 19.5  | 10.83 | 0.001 | 19.5  | 2.07 | 0.237 | 19.5  | 6.41  | 0.012 |
| <b>MBL 065</b> | 18.91 | 4.32 | 0.05  | 18.91 | 8.86  | 0.002 | 18.91 | 1.33 | 0.397 | 18.91 | 3.73  | 0.075 |
| <b>MBL 066</b> | 17.78 | 5.79 | 0.018 | 17.78 | 11.96 | 0     | 17.78 | 3.67 | 0.079 | 17.78 | 6.04  | 0.015 |
| <b>MBL 067</b> | 18.33 | 4.59 | 0.042 | 18.33 | 12.3  | 0     | 18.33 | 3.42 | 0.094 | 18.33 | 5.45  | 0.023 |
| <b>MBL 068</b> | 18.34 | 5.14 | 0.028 | 18.34 | 9.83  | 0.001 | 18.34 | 2.34 | 0.198 | 18.34 | 4.72  | 0.038 |
| <b>MBL 069</b> | 19.4  | 7.13 | 0.007 | 19.4  | 13.91 | 0     | 19.4  | 5.53 | 0.022 | 19.4  | 10.12 | 0.001 |
| <b>MBL 070</b> | 23.76 | 4.16 | 0.056 | 23.76 | NA    | NA    | 23.76 | 3.4  | 0.094 | 23.76 | 6.99  | 0.008 |
| <b>MBL 071</b> | 20.45 | 3.76 | 0.074 | 20.45 | 8.16  | 0.003 | 20.45 | 0.11 | 0.925 | 20.45 | 3.13  | 0.114 |

## Supplemental data – Ferrajoli, Shanafelt, Ivan et al

|                |       |      |       |       |       |       |       |      |       |       |       |       |
|----------------|-------|------|-------|-------|-------|-------|-------|------|-------|-------|-------|-------|
| <b>MBL 072</b> | 18.2  | 3.19 | 0.109 | 18.2  | 8.87  | 0.002 | 18.2  | 0.98 | 0.506 | 18.2  | 4.57  | 0.042 |
| <b>MBL 073</b> | 18.21 | 3.93 | 0.066 | 18.21 | 10.32 | 0.001 | 18.21 | 2.1  | 0.233 | 18.21 | 4.74  | 0.037 |
| <b>MBL 074</b> | 18.29 | 6    | 0.016 | 18.29 | 11.3  | 0     | 18.29 | 3.35 | 0.098 | 18.29 | 5.23  | 0.027 |
| <b>MBL 075</b> | 18.48 | 5.76 | 0.018 | 18.48 | 13.82 | 0     | 18.48 | 4.86 | 0.034 | 18.48 | 6.41  | 0.012 |
| <b>MBL 076</b> | 18.7  | 8.68 | 0.002 | 18.7  | NA    | NA    | 18.7  | 8.03 | 0.004 | 18.7  | 11.59 | 0     |
| <b>MBL 077</b> | 18.7  | 5.64 | 0.02  | 18.7  | 12.23 | 0     | 18.7  | 3.67 | 0.079 | 18.7  | 7.42  | 0.006 |
| <b>MBL 078</b> | 19.94 | 6.04 | 0.015 | 19.94 | 12.38 | 0     | 19.94 | 3.64 | 0.08  | 19.94 | 7.8   | 0.004 |
| <b>MBL 079</b> | 17.7  | 6.53 | 0.011 | 17.7  | 12.28 | 0     | 17.7  | 3.91 | 0.067 | 17.7  | 7.17  | 0.007 |
| <b>MBL 080</b> | 17.25 | 6.1  | 0.015 | 17.25 | 11.99 | 0     | 17.25 | 4.08 | 0.059 | 17.25 | 5.97  | 0.016 |
| <b>MBL 081</b> | 19.07 | 4.63 | 0.04  | 19.07 | 10.52 | 0.001 | 19.07 | 2.22 | 0.215 | 19.07 | 5.75  | 0.019 |
| <b>MBL 082</b> | 21.15 | 5.43 | 0.023 | 21.15 | 11.89 | 0     | 21.15 | 2.44 | 0.184 | 21.15 | 8.01  | 0.004 |
| <b>MBL 083</b> | 22.31 | 7    | 0.008 | 22.31 | NA    | NA    | 22.31 | 6.68 | 0.01  | 22.31 | 9.94  | 0.001 |
| <b>MBL 084</b> | 24.01 | 6.84 | 0.009 | 24.01 | NA    | NA    | 24.01 | 6.26 | 0.013 | 24.01 | 9.83  | 0.001 |
| <b>MBL 085</b> | 19.08 | 5.48 | 0.022 | 19.08 | NA    | NA    | 19.08 | 5.85 | 0.017 | 19.08 | 7.32  | 0.006 |
| <b>MBL 086</b> | 18.36 | 4.69 | 0.039 | 18.36 | 10.13 | 0.001 | 18.36 | 2.36 | 0.195 | 18.36 | 4.77  | 0.037 |
| <b>MBL 087</b> | 18.87 | 3.33 | 0.099 | 18.87 | 9.1   | 0.002 | 18.87 | 1.34 | 0.396 | 18.87 | 3.56  | 0.085 |
| <b>MBL 088</b> | 18.09 | 5.19 | 0.027 | 18.09 | 10.64 | 0.001 | 18.09 | 2.42 | 0.187 | 18.09 | 4.96  | 0.032 |
| <b>MBL 089</b> | 18.18 | 5.59 | 0.021 | 18.18 | 10.53 | 0.001 | 18.18 | 2.04 | 0.243 | 18.18 | 5.56  | 0.021 |
| <b>MBL 090</b> | 23.1  | 5.23 | 0.027 | 23.1  | NA    | NA    | 23.1  | 4.37 | 0.048 | 23.1  | 8.74  | 0.002 |
| <b>MBL 091</b> | 19.08 | 3.85 | 0.07  | 19.08 | 10.3  | 0.001 | 19.08 | 1.71 | 0.305 | 19.08 | 4.48  | 0.045 |
| <b>MBL 092</b> | 18.36 | 4.87 | 0.034 | 18.36 | 10.27 | 0.001 | 18.36 | 2.12 | 0.23  | 18.36 | 5.36  | 0.024 |
| <b>MBL 093</b> | 18.36 | 7.07 | 0.007 | 18.36 | 12.27 | 0     | 18.36 | 3.16 | 0.112 | 18.36 | 7.75  | 0.005 |
| <b>MBL 094</b> | 21.7  | 7.92 | 0.004 | 21.7  | NA    | NA    | 21.7  | 7.42 | 0.006 | 21.7  | 10.96 | 0.001 |
| <b>MBL 095</b> | 18.58 | 3.69 | 0.077 | 18.58 | 9.44  | 0.001 | 18.58 | 1.56 | 0.338 | 18.58 | 5.02  | 0.031 |
| <b>MBL 096</b> | 18.15 | 4.91 | 0.033 | 18.15 | 9.93  | 0.001 | 18.15 | 2.19 | 0.219 | 18.15 | 4.39  | 0.048 |
| <b>MBL 097</b> | 18.25 | 6.6  | 0.01  | 18.25 | 10.23 | 0.001 | 18.25 | 2.15 | 0.226 | 18.25 | 5.98  | 0.016 |
| <b>MBL 098</b> | 18.2  | 4.48 | 0.045 | 18.2  | 9.91  | 0.001 | 18.2  | 2.18 | 0.221 | 18.2  | 4.31  | 0.05  |
| <b>MBL 099</b> | 18.6  | 5.65 | 0.02  | 18.6  | 10.77 | 0.001 | 18.6  | 2.47 | 0.181 | 18.6  | 6.12  | 0.014 |
| <b>MBL 100</b> | 18.14 | 5.2  | 0.027 | 18.14 | 14.72 | 0     | 18.14 | 4.9  | 0.033 | 18.14 | 5.02  | 0.031 |
| <b>MBL 101</b> | 19.06 | 3.64 | 0.08  | 19.06 | 10.72 | 0.001 | 19.06 | 2.3  | 0.203 | 19.06 | 5.58  | 0.021 |
| <b>MBL 102</b> | 18.12 | 3.57 | 0.084 | 18.12 | 10.46 | 0.001 | 18.12 | 1.99 | 0.251 | 18.12 | 4.86  | 0.034 |
| <b>MBL 103</b> | 19.77 | 5.44 | 0.023 | 19.77 | 11.29 | 0     | 19.77 | 2.82 | 0.142 | 19.77 | 6.79  | 0.009 |
| <b>MBL 104</b> | 19.54 | 6.28 | 0.013 | 19.54 | 12.7  | 0     | 19.54 | 4.33 | 0.05  | 19.54 | 7.56  | 0.005 |
| <b>MBL 105</b> | 18.71 | 5.38 | 0.024 | 18.71 | 11.03 | 0     | 18.71 | 2.97 | 0.128 | 18.71 | 6.02  | 0.015 |
| <b>MBL 106</b> | 18.02 | 7.37 | 0.006 | 18.02 | 9.92  | 0.001 | 18.02 | 2.42 | 0.187 | 18.02 | 5.7   | 0.019 |
| <b>MBL 107</b> | 17.65 | 4.47 | 0.045 | 17.65 | 10.43 | 0.001 | 17.65 | 2.28 | 0.206 | 17.65 | 6.34  | 0.012 |
| <b>MBL 108</b> | 18.52 | 5.55 | 0.021 | 18.52 | 10.72 | 0.001 | 18.52 | 2.57 | 0.169 | 18.52 | 6.04  | 0.015 |
| <b>MBL 109</b> | 18.16 | 5.25 | 0.026 | 18.16 | 11.63 | 0     | 18.16 | 3.79 | 0.073 | 18.16 | 5.94  | 0.016 |

| MBL 110                                                       | 18.41   | 7.79        | 0.005               | 18.41   | 12.24       | 0                   | 18.41   | 3.57        | 0.084               | 18.41   | 7.67        | 0.005               |
|---------------------------------------------------------------|---------|-------------|---------------------|---------|-------------|---------------------|---------|-------------|---------------------|---------|-------------|---------------------|
| MBL 111                                                       | 18.18   | 5.81        | 0.018               | 18.18   | 12.87       | 0                   | 18.18   | 4.23        | 0.053               | 18.18   | 6.28        | 0.013               |
| Samples from patients with chronic lymphocytic leukemia (CLL) |         |             |                     |         |             |                     |         |             |                     |         |             |                     |
| ID                                                            | miR-155 |             |                     | miR-15a |             |                     | miR-16  |             |                     | miR-21  |             |                     |
|                                                               | 5S rRNA | $\Delta$ Ct | Relative expression | 5S rRNA | $\Delta$ Ct | Relative expression | 5S rRNA | $\Delta$ Ct | Relative expression | 5S rRNA | $\Delta$ Ct | Relative expression |
| CLLRai0 001                                                   | 19.66   | 3.62        | 0.082               | 19.66   | 8.23        | 0.003               | 19.66   | 0.8         | 0.573               | 19.66   | 3.09        | 0.118               |
| CLLRai0 002                                                   | 17.91   | 3.89        | 0.068               | 17.91   | 8.39        | 0.003               | 17.91   | 1.58        | 0.335               | 17.91   | 3.44        | 0.092               |
| CLLRai0 003                                                   | 19.24   | 4.21        | 0.054               | 19.24   | 8.66        | 0.002               | 19.24   | 1.95        | 0.259               | 19.24   | 2.9         | 0.134               |
| CLLRai0 004                                                   | 19.63   | 4.96        | 0.032               | 19.63   | 8.73        | 0.002               | 19.63   | 1.69        | 0.31                | 19.63   | 3.45        | 0.092               |
| CLLRai0 005                                                   | 18.99   | 3.41        | 0.094               | 18.99   | 9.08        | 0.002               | 18.99   | 2.31        | 0.202               | 18.99   | 3.25        | 0.105               |
| CLLRai0 006                                                   | 19.03   | 3.25        | 0.105               | 19.03   | 10.58       | 0.001               | 19.03   | 2.95        | 0.129               | 19.03   | 2.33        | 0.199               |
| CLLRai0 007                                                   | 19.21   | 5.24        | 0.026               | 19.21   | 8.7         | 0.002               | 19.21   | 1.65        | 0.319               | 19.21   | 3.75        | 0.075               |
| CLLRai0 008                                                   | 19.81   | 3.38        | 0.096               | 19.81   | 8.84        | 0.002               | 19.81   | 1.65        | 0.319               | 19.81   | 2.05        | 0.241               |
| CLLRai0 009                                                   | 18.49   | 4.08        | 0.059               | 18.49   | 9.03        | 0.002               | 18.49   | 1.76        | 0.296               | 18.49   | 4.05        | 0.06                |
| CLLRai0 010                                                   | 20.43   | 1.99        | 0.251               | 20.43   | 8.27        | 0.003               | 20.43   | 1.11        | 0.464               | 20.43   | 1.93        | 0.262               |
| CLLRai0 011                                                   | 20.81   | 1.28        | 0.411               | 20.81   | 5.87        | 0.017               | 20.81   | -1.36       | 2.561               | 20.81   | 1.16        | 0.448               |
| CLLRai0 012                                                   | 20.04   | 1.27        | 0.413               | 20.04   | 6.27        | 0.013               | 20.04   | -0.47       | 1.389               | 20.04   | 1.72        | 0.305               |
| CLLRai0 013                                                   | 20.34   | 2.29        | 0.204               | 20.34   | 8.24        | 0.003               | 20.34   | 1.11        | 0.464               | 20.34   | 2.05        | 0.242               |
| CLLRai0 014                                                   | 18.22   | 4.68        | 0.039               | 18.22   | 8.52        | 0.003               | 18.22   | 1.84        | 0.279               | 18.22   | 3.67        | 0.078               |
| CLLRai0 015                                                   | 20.38   | 2.27        | 0.207               | 20.38   | 6.46        | 0.011               | 20.38   | -0.3        | 1.23                | 20.38   | 1.7         | 0.307               |
| CLLRai0 016                                                   | 20.31   | 3.12        | 0.115               | 20.31   | 8.59        | 0.003               | 20.31   | 1.23        | 0.425               | 20.31   | 1.73        | 0.302               |
| CLLRai0 017                                                   | 18.42   | 4.43        | 0.047               | 18.42   | 10.11       | 0.001               | 18.42   | 1.89        | 0.27                | 18.42   | 4.51        | 0.044               |
| CLLRai0 018                                                   | 19.77   | 3.73        | 0.076               | 19.77   | 7.7         | 0.005               | 19.77   | 0.71        | 0.61                | 19.77   | 2.31        | 0.202               |
| CLLRai0 019                                                   | 19.49   | 3.65        | 0.08                | 19.49   | 8.84        | 0.002               | 19.49   | 1.93        | 0.262               | 19.49   | 3.19        | 0.109               |
| CLLRai0 020                                                   | 18.08   | 2.92        | 0.132               | 18.08   | 8.74        | 0.002               | 18.08   | 1.19        | 0.437               | 18.08   | 3.22        | 0.107               |
| CLLRai0 021                                                   | 18.48   | 5.23        | 0.027               | 18.48   | 8.64        | 0.003               | 18.48   | 1.65        | 0.318               | 18.48   | 3.85        | 0.069               |
| CLLRai0 022                                                   | 19.17   | 3.58        | 0.083               | 19.17   | 10.63       | 0.001               | 19.17   | 2.92        | 0.133               | 19.17   | 3.43        | 0.093               |
| CLLRai0 023                                                   | 19.85   | 5.07        | 0.03                | 19.85   | 8.34        | 0.003               | 19.85   | 1.1         | 0.468               | 19.85   | 3.98        | 0.063               |
| CLLRai0 024                                                   | 20.19   | 2.16        | 0.224               | 20.19   | 6.7         | 0.01                | 20.19   | -0.49       | 1.403               | 20.19   | 2.46        | 0.181               |
| CLLRai0 025                                                   | 19.55   | 2.43        | 0.186               | 19.55   | 7.4         | 0.006               | 19.55   | 0.27        | 0.827               | 19.55   | 2.3         | 0.203               |
| CLLRai0 026                                                   | 20.24   | 4.35        | 0.049               | 20.24   | 6.31        | 0.013               | 20.24   | -0.37       | 1.295               | 20.24   | 2.78        | 0.145               |
| CLLRai0 027                                                   | 20.02   | 2.07        | 0.238               | 20.02   | 6.87        | 0.009               | 20.02   | 0.3         | 0.812               | 20.02   | 1.58        | 0.335               |
| CLLRai0 028                                                   | 19.76   | 3.07        | 0.119               | 19.76   | 7.39        | 0.006               | 19.76   | 0.73        | 0.605               | 19.76   | 2.27        | 0.208               |
| CLLRai0 029                                                   | 18.81   | 3.78        | 0.073               | 18.81   | 8.59        | 0.003               | 18.81   | 1.89        | 0.27                | 18.81   | 3.37        | 0.097               |
| CLLRai0 030                                                   | 18.65   | 4.27        | 0.052               | 18.65   | 8.52        | 0.003               | 18.65   | 1.65        | 0.32                | 18.65   | 3.41        | 0.094               |
| CLLRai0 031                                                   | 17.62   | 3.27        | 0.103               | 17.62   | 10.48       | 0.001               | 17.62   | 2.58        | 0.168               | 17.62   | 2.9         | 0.134               |
| CLLRai0 032                                                   | 19.17   | 3.64        | 0.08                | 19.17   | 8.28        | 0.003               | 19.17   | 1.33        | 0.399               | 19.17   | 3.32        | 0.1                 |

Supplemental data – Ferrajoli, Shanafelt, Ivan et al

|                      |       |       |       |       |       |       |       |       |       |       |       |       |
|----------------------|-------|-------|-------|-------|-------|-------|-------|-------|-------|-------|-------|-------|
| <b>CLLRai0 033</b>   | 17.91 | 5.38  | 0.024 | 17.91 | 9.04  | 0.002 | 17.91 | 2.03  | 0.245 | 17.91 | 4.72  | 0.038 |
| <b>CLLRai0 034</b>   | 19.6  | 5.22  | 0.027 | 19.6  | 8.56  | 0.003 | 19.6  | 0.94  | 0.523 | 19.6  | 3.76  | 0.074 |
| <b>CLLRai0 035</b>   | 19.17 | 3.05  | 0.12  | 19.17 | 7.32  | 0.006 | 19.17 | 0.34  | 0.791 | 19.17 | 2.95  | 0.13  |
| <b>CLLRai0 036</b>   | 18.57 | 4.52  | 0.044 | 18.57 | 9.88  | 0.001 | 18.57 | 2.04  | 0.243 | 18.57 | 4.67  | 0.039 |
| <b>CLLRai0 037</b>   | 17.71 | 2.76  | 0.147 | 17.71 | 8.17  | 0.003 | 17.71 | 0.48  | 0.719 | 17.71 | 2.8   | 0.143 |
| <b>CLLRai0 038</b>   | 17.98 | 3.13  | 0.114 | 17.98 | 9.08  | 0.002 | 17.98 | 1.55  | 0.341 | 17.98 | 3.19  | 0.11  |
| <b>CLLRai0 039</b>   | 18.06 | 5.64  | 0.02  | 18.06 | 8.58  | 0.003 | 18.06 | 0.62  | 0.65  | 18.06 | 4.68  | 0.039 |
| <b>CLLRai0 040</b>   | 18.58 | 3.81  | 0.071 | 18.58 | 9.25  | 0.002 | 18.58 | 1.14  | 0.453 | 18.58 | 4.11  | 0.058 |
| <b>CLLRai0 041</b>   | 17.62 | 4.43  | 0.046 | 17.62 | 10.33 | 0.001 | 17.62 | 2.58  | 0.167 | 17.62 | 4.22  | 0.054 |
| <b>CLLRai0 042</b>   | 20.17 | 4.3   | 0.051 | 20.17 | 11.2  | 0     | 20.17 | 2.78  | 0.145 | 20.17 | 5.59  | 0.021 |
| <b>CLLRai0 043</b>   | 17.14 | 4.68  | 0.039 | 17.14 | 8.91  | 0.002 | 17.14 | 1.37  | 0.386 | 17.14 | 4.71  | 0.038 |
| <b>CLLRai0 044</b>   | 23.04 | -0.08 | 1.057 | 23.04 | 4.91  | 0.033 | 23.04 | -3.03 | 8.188 | 23.04 | -0.06 | 1.039 |
| <b>CLLRai0 045</b>   | 17.6  | 3.75  | 0.074 | 17.6  | 12.11 | 0     | 17.6  | 3.86  | 0.069 | 17.6  | 4.69  | 0.039 |
| <b>CLLRai0 046</b>   | 17.12 | 3.96  | 0.064 | 17.12 | 9.29  | 0.002 | 17.12 | 1.69  | 0.309 | 17.12 | 3.65  | 0.079 |
| <b>CLLRai0 047</b>   | 17.06 | 3.52  | 0.087 | 17.06 | 9.04  | 0.002 | 17.06 | 1.4   | 0.379 | 17.06 | 3.57  | 0.084 |
| <b>CLLRai0 048</b>   | 18.68 | 5.36  | 0.024 | 18.68 | 10.29 | 0.001 | 18.68 | 2.13  | 0.228 | 18.68 | 5.46  | 0.023 |
| <b>CLLRai0 049</b>   | 17.38 | 4.21  | 0.054 | 17.38 | 9.25  | 0.002 | 17.38 | 1.72  | 0.303 | 17.38 | 4.26  | 0.052 |
| <b>CLLRai1-4 001</b> | 19.19 | 4     | 0.062 | 19.19 | 8.44  | 0.003 | 19.19 | 0.99  | 0.503 | 19.19 | 3.34  | 0.099 |
| <b>CLLRai1-4 002</b> | 19.16 | 2.79  | 0.145 | 19.16 | 7.34  | 0.006 | 19.16 | 0.38  | 0.768 | 19.16 | 3.21  | 0.108 |
| <b>CLLRai1-4 003</b> | 18.63 | 5.12  | 0.029 | 18.63 | 9.96  | 0.001 | 18.63 | 2.6   | 0.165 | 18.63 | 4.48  | 0.045 |
| <b>CLLRai1-4 004</b> | 18.55 | 3.7   | 0.077 | 18.55 | 9.22  | 0.002 | 18.55 | 2.01  | 0.248 | 18.55 | 4.41  | 0.047 |
| <b>CLLRai1-4 005</b> | 18.86 | 5.98  | 0.016 | 18.86 | 8.36  | 0.003 | 18.86 | 1.16  | 0.446 | 18.86 | 4.12  | 0.057 |
| <b>CLLRai1-4 006</b> | 18.67 | 3.15  | 0.113 | 18.67 | 8.31  | 0.003 | 18.67 | 1.21  | 0.432 | 18.67 | 3.96  | 0.064 |
| <b>CLLRai1-4 007</b> | 18.87 | 5.38  | 0.024 | 18.87 | 8.59  | 0.003 | 18.87 | 1.33  | 0.397 | 18.87 | 3.77  | 0.073 |
| <b>CLLRai1-4 008</b> | 19.47 | 5.08  | 0.029 | 19.47 | 9.78  | 0.001 | 19.47 | 1.2   | 0.434 | 19.47 | 5.81  | 0.018 |
| <b>CLLRai1-4 009</b> | 18.99 | 5.21  | 0.027 | 18.99 | 10.14 | 0.001 | 18.99 | 1.79  | 0.288 | 18.99 | 4.47  | 0.045 |
| <b>CLLRai1-4 010</b> | 19.18 | 5.35  | 0.024 | 19.18 | 8.7   | 0.002 | 19.18 | 1.08  | 0.473 | 19.18 | 4.46  | 0.045 |
| <b>CLLRai1-4 011</b> | 18.79 | 3.39  | 0.095 | 18.79 | 7.59  | 0.005 | 18.79 | 0.19  | 0.877 | 18.79 | 2.31  | 0.202 |
| <b>CLLRai1-4 012</b> | 17.93 | 2.75  | 0.149 | 17.93 | 11.15 | 0     | 17.93 | 2.89  | 0.135 | 17.93 | 2.64  | 0.16  |
| <b>CLLRai1-4 013</b> | 19.29 | 5.41  | 0.024 | 19.29 | 7.81  | 0.004 | 19.29 | 0.96  | 0.512 | 19.29 | 3.57  | 0.084 |
| <b>CLLRai1-4 014</b> | 18.27 | 3.33  | 0.1   | 18.27 | 8.93  | 0.002 | 18.27 | 1.55  | 0.342 | 18.27 | 3.63  | 0.081 |
| <b>CLLRai1-4 015</b> | 18.48 | 2.77  | 0.147 | 18.48 | 7.79  | 0.005 | 18.48 | 0.97  | 0.51  | 18.48 | 3.1   | 0.117 |
| <b>CLLRai1-4 016</b> | 18.85 | 3.26  | 0.104 | 18.85 | 8.82  | 0.002 | 18.85 | 1.76  | 0.295 | 18.85 | 3.68  | 0.078 |
| <b>CLLRai1-4 017</b> | 17.42 | 4.09  | 0.059 | 17.42 | 10.99 | 0     | 17.42 | 3.71  | 0.076 | 17.42 | 3.83  | 0.07  |
| <b>CLLRai1-4 018</b> | 18.2  | 5.14  | 0.028 | 18.2  | 9.24  | 0.002 | 18.2  | 2.4   | 0.19  | 18.2  | 4.15  | 0.056 |
| <b>CLLRai1-4 019</b> | 18.76 | 4.65  | 0.04  | 18.76 | 8.68  | 0.002 | 18.76 | 1.62  | 0.326 | 18.76 | 4.26  | 0.052 |
| <b>CLLRai1-4 020</b> | 18.36 | 5.18  | 0.028 | 18.36 | 8.82  | 0.002 | 18.36 | 2.17  | 0.222 | 18.36 | 3.88  | 0.068 |
| <b>CLLRai1-4 021</b> | 17.86 | 3.32  | 0.1   | 17.86 | 7.92  | 0.004 | 17.86 | 0.78  | 0.584 | 17.86 | 3.74  | 0.075 |

Supplemental data – Ferrajoli, Shanafelt, Ivan et al

|                      |       |      |       |       |       |       |       |       |       |       |      |       |
|----------------------|-------|------|-------|-------|-------|-------|-------|-------|-------|-------|------|-------|
| <b>CLLRai1-4 022</b> | 18.46 | 3.47 | 0.09  | 18.46 | 9.03  | 0.002 | 18.46 | 1.63  | 0.323 | 18.46 | 4.19 | 0.055 |
| <b>CLLRai1-4 023</b> | 19.26 | 1.52 | 0.348 | 19.26 | 6.28  | 0.013 | 19.26 | -0.49 | 1.407 | 19.26 | 1.97 | 0.256 |
| <b>CLLRai1-4 024</b> | 19    | 3.1  | 0.116 | 19    | 7.34  | 0.006 | 19    | 0.55  | 0.681 | 19    | 2.1  | 0.234 |
| <b>CLLRai1-4 025</b> | 19.24 | 2.67 | 0.157 | 19.24 | 6.95  | 0.008 | 19.24 | 0.15  | 0.904 | 19.24 | 1.95 | 0.258 |
| <b>CLLRai1-4 026</b> | 19.1  | 3.83 | 0.07  | 19.1  | 8     | 0.004 | 19.1  | 0.93  | 0.526 | 19.1  | 2.5  | 0.177 |
| <b>CLLRai1-4 027</b> | 19.4  | 1.78 | 0.291 | 19.4  | 7.49  | 0.006 | 19.4  | -0.18 | 1.13  | 19.4  | 1.39 | 0.382 |
| <b>CLLRai1-4 028</b> | 19.34 | 5.89 | 0.017 | 19.34 | 7.12  | 0.007 | 19.34 | 0.39  | 0.763 | 19.34 | 4.1  | 0.058 |
| <b>CLLRai1-4 029</b> | 20.17 | 2.47 | 0.18  | 20.17 | 7.36  | 0.006 | 20.17 | 0.28  | 0.821 | 20.17 | 2.13 | 0.228 |
| <b>CLLRai1-4 030</b> | 19.99 | 1.36 | 0.39  | 19.99 | 6.12  | 0.014 | 19.99 | -0.78 | 1.718 | 19.99 | 1.71 | 0.305 |
| <b>CLLRai1-4 031</b> | 19.54 | 2.48 | 0.179 | 19.54 | 6.46  | 0.011 | 19.54 | -0.17 | 1.125 | 19.54 | 2.14 | 0.228 |
| <b>CLLRai1-4 032</b> | 19.79 | 2.24 | 0.211 | 19.79 | 5.58  | 0.021 | 19.79 | -1.34 | 2.538 | 19.79 | 1.76 | 0.295 |
| <b>CLLRai1-4 033</b> | 19.64 | 5.22 | 0.027 | 19.64 | 7.12  | 0.007 | 19.64 | 0.02  | 0.983 | 19.64 | 3.28 | 0.103 |
| <b>CLLRai1-4 034</b> | 19.18 | 4.25 | 0.052 | 19.18 | 7.63  | 0.005 | 19.18 | 0.88  | 0.544 | 19.18 | 3    | 0.125 |
| <b>CLLRai1-4 035</b> | 19.63 | 3.87 | 0.069 | 19.63 | 7.42  | 0.006 | 19.63 | 0.2   | 0.868 | 19.63 | 2.83 | 0.141 |
| <b>CLLRai1-4 036</b> | 18.27 | 4.97 | 0.032 | 18.27 | 10.59 | 0.001 | 18.27 | 1.85  | 0.277 | 18.27 | 5.65 | 0.02  |
| <b>CLLRai1-4 037</b> | 18.13 | 3.35 | 0.098 | 18.13 | 9.32  | 0.002 | 18.13 | 1.97  | 0.256 | 18.13 | 4.64 | 0.04  |
| <b>CLLRai1-4 038</b> | 18.3  | 4.69 | 0.039 | 18.3  | 9.04  | 0.002 | 18.3  | 1.58  | 0.336 | 18.3  | 4.17 | 0.055 |
| <b>CLLRai1-4 039</b> | 19.48 | 4.11 | 0.058 | 19.48 | 8.63  | 0.003 | 19.48 | 1.38  | 0.383 | 19.48 | 2.98 | 0.126 |
| <b>CLLRai1-4 040</b> | 18.31 | 1.42 | 0.374 | 18.31 | 12.41 | 0     | 18.31 | 2.57  | 0.168 | 18.31 | 1.29 | 0.408 |
| <b>CLLRai1-4 041</b> | 18.45 | 1.94 | 0.26  | 18.45 | 7.68  | 0.005 | 18.45 | -0.15 | 1.111 | 18.45 | 3.25 | 0.105 |
| <b>CLLRai1-4 042</b> | 19.92 | 3.47 | 0.09  | 19.92 | 9.62  | 0.001 | 19.92 | 1.35  | 0.391 | 19.92 | 4.31 | 0.05  |
| <b>CLLRai1-4 043</b> | 20.12 | 2.57 | 0.168 | 20.12 | 8.69  | 0.002 | 20.12 | 0.73  | 0.604 | 20.12 | 3.31 | 0.101 |
| <b>CLLRai1-4 044</b> | 19.35 | 2.81 | 0.142 | 19.35 | 9.16  | 0.002 | 19.35 | 1.01  | 0.496 | 19.35 | 3.89 | 0.068 |

NA = not available.



**Supplementary Table 4. miRNA expression in plasma from patients with chronic lymphocytic leukemia (CLL) (groups B, C, and D; raw data).**

| ID     | miR-155 |               |                     | miR-21 |               |                     |
|--------|---------|---------------|---------------------|--------|---------------|---------------------|
|        | miR-16  | $\Delta C(t)$ | Relative expression | miR-16 | $\Delta C(t)$ | Relative expression |
| CLL001 | 25.83   | 5.54          | 0.021               | 25.83  | 1.24          | 0.423               |
| CLL002 | 24.74   | 6.31          | 0.013               | 24.74  | 0.3           | 0.81                |
| CLL003 | 28.02   | 3.51          | 0.088               | 28.02  | 0.09          | 0.937               |
| CLL004 | 26.9    | 4.16          | 0.056               | 26.9   | 0.03          | 0.983               |
| CLL005 | 25.03   | 6.1           | 0.015               | 25.03  | 0.82          | 0.567               |
| CLL006 | 26.32   | 4.03          | 0.061               | 26.32  | 0.29          | 0.817               |
| CLL007 | 27.24   | 3.5           | 0.089               | 27.24  | 1.18          | 0.441               |
| CLL008 | 25.17   | 5.04          | 0.03                | 25.17  | 0.3           | 0.811               |
| CLL009 | 24.84   | 5.56          | 0.021               | 24.84  | 0.44          | 0.738               |
| CLL010 | 26.71   | 4.7           | 0.039               | 26.71  | 0.33          | 0.794               |
| CLL011 | 26.38   | 3.92          | 0.066               | 26.38  | -0.48         | 1.397               |
| CLL012 | 25.55   | 4.81          | 0.036               | 25.55  | 0.73          | 0.605               |
| CLL013 | 24.29   | 6.07          | 0.015               | 24.29  | 1.21          | 0.433               |
| CLL014 | 22.63   | 5.45          | 0.023               | 22.63  | 1.23          | 0.427               |
| CLL015 | 22.46   | 5.36          | 0.024               | 22.46  | 2.28          | 0.206               |
| CLL016 | 24.68   | 4.36          | 0.049               | 24.68  | 0.96          | 0.515               |
| CLL017 | 28.53   | 3.12          | 0.115               | 28.53  | 1.06          | 0.48                |
| CLL018 | 25.37   | 4.03          | 0.061               | 25.37  | 0.66          | 0.635               |
| CLL019 | 27.91   | 3.81          | 0.071               | 27.91  | 0.87          | 0.549               |
| CLL020 | 27.42   | 2.04          | 0.242               | 27.42  | 0.07          | 0.951               |
| CLL021 | 25.66   | 5.27          | 0.026               | 25.66  | 1.17          | 0.445               |
| CLL022 | 25.61   | 5.69          | 0.019               | 25.61  | 1.54          | 0.343               |
| CLL023 | 24.7    | 5.97          | 0.016               | 24.7   | 0.32          | 0.801               |
| CLL024 | 27.77   | 3.7           | 0.077               | 27.77  | 0.02          | 0.985               |
| CLL025 | 23.74   | 4.92          | 0.033               | 23.74  | 0.41          | 0.753               |
| CLL026 | 26.62   | 4.32          | 0.05                | 26.62  | 0.71          | 0.613               |

Supplemental data – Ferrajoli, Shanafelt, Ivan et al

|        |       |      |       |       |       |       |
|--------|-------|------|-------|-------|-------|-------|
| CLL027 | 28.27 | 3.02 | 0.123 | 28.27 | 0.82  | 0.566 |
| CLL028 | 23.69 | 4.19 | 0.055 | 23.69 | 1.2   | 0.435 |
| CLL029 | 21.28 | 5.25 | 0.026 | 21.28 | 2.41  | 0.189 |
| CLL030 | 25.72 | 5.35 | 0.024 | 25.72 | 0.44  | 0.738 |
| CLL031 | 24.67 | 6.38 | 0.012 | 24.67 | 0.54  | 0.687 |
| CLL032 | 25.25 | 5.73 | 0.019 | 25.25 | -0.19 | 1.139 |
| CLL033 | 23.71 | 6.33 | 0.012 | 23.71 | 1.45  | 0.365 |
| CLL034 | 26.78 | 6.46 | 0.011 | 26.78 | 0.56  | 0.681 |
| CLL035 | 25.07 | 6.65 | 0.01  | 25.07 | 0.45  | 0.734 |
| CLL036 | 27.13 | 3.54 | 0.086 | 27.13 | -0.25 | 1.193 |
| CLL037 | 22.84 | 5.52 | 0.022 | 22.84 | 0.47  | 0.721 |
| CLL038 | 25.65 | 4.34 | 0.049 | 25.65 | 0.71  | 0.613 |
| CLL039 | 26.14 | 5.67 | 0.02  | 26.14 | 0.24  | 0.847 |
| CLL040 | 24.94 | 7.13 | 0.007 | 24.94 | 0.73  | 0.604 |
| CLL041 | 25.32 | 6.09 | 0.015 | 25.32 | 0.47  | 0.723 |
| CLL042 | 24.92 | 3.07 | 0.119 | 24.92 | -0.6  | 1.512 |
| CLL043 | 24.92 | 3.95 | 0.065 | 24.92 | 0.21  | 0.866 |
| CLL044 | 24.9  | 3.86 | 0.069 | 24.9  | 0.36  | 0.777 |
| CLL045 | 25.28 | 4.93 | 0.033 | 25.28 | -0.3  | 1.23  |
| CLL046 | 24.77 | 6.4  | 0.012 | 24.77 | 0.39  | 0.762 |
| CLL047 | 26.3  | 5.2  | 0.027 | 26.3  | -0.03 | 1.018 |
| CLL048 | 26.58 | 4.58 | 0.042 | 26.58 | -0.27 | 1.205 |
| CLL049 | 24.32 | 6.03 | 0.015 | 24.32 | 0.4   | 0.757 |
| CLL050 | 30.24 | 1.82 | 0.282 | 30.24 | -1    | 1.993 |
| CLL051 | 26.53 | 4.23 | 0.053 | 26.53 | -1.29 | 2.442 |
| CLL052 | 25.89 | 4.15 | 0.056 | 25.89 | -0.11 | 1.077 |
| CLL053 | 26.64 | 4.77 | 0.037 | 26.64 | -0.3  | 1.235 |
| CLL054 | 26.66 | 4.61 | 0.041 | 26.66 | -0.37 | 1.293 |
| CLL055 | 27.31 | 4.52 | 0.044 | 27.31 | -0.02 | 1.013 |
| CLL056 | 26.88 | 4.08 | 0.059 | 26.88 | -0.31 | 1.243 |
| CLL057 | 24.24 | 5.36 | 0.024 | 24.24 | 0.31  | 0.804 |

Supplemental data – Ferrajoli, Shanafelt, Ivan et al

|        |       |      |       |       |       |       |
|--------|-------|------|-------|-------|-------|-------|
| CLL058 | 26.47 | 5.11 | 0.029 | 26.47 | 0.07  | 0.953 |
| CLL059 | 27.11 | 3.24 | 0.106 | 27.11 | -1.18 | 2.265 |
| CLL060 | 25.79 | 6.25 | 0.013 | 25.79 | 0.5   | 0.705 |
| CLL061 | 24.99 | 6.4  | 0.012 | 24.99 | 1.11  | 0.462 |
| CLL062 | 25.77 | 3.06 | 0.12  | 25.77 | 0.34  | 0.792 |
| CLL063 | 25.81 | 3.81 | 0.071 | 25.81 | 0.2   | 0.868 |
| CLL064 | 27.04 | 4.34 | 0.049 | 27.04 | 0.21  | 0.864 |
| CLL065 | 27.5  | 4.7  | 0.039 | 27.5  | 0.37  | 0.776 |
| CLL066 | 25.23 | 6.31 | 0.013 | 25.23 | -0.01 | 1.006 |
| CLL067 | 26.82 | 6.54 | 0.011 | 26.82 | 0.17  | 0.891 |
| CLL068 | 30.19 | 2    | 0.251 | 30.19 | -0.78 | 1.717 |
| CLL069 | 26.73 | 4.42 | 0.047 | 26.73 | 0.52  | 0.695 |
| CLL070 | 25.01 | 3.25 | 0.105 | 25.01 | 0.31  | 0.808 |
| CLL071 | 24.62 | 4.1  | 0.058 | 24.62 | 1.97  | 0.256 |
| CLL072 | 26.87 | 4.48 | 0.045 | 26.87 | 0.14  | 0.906 |
| CLL073 | 26.65 | 5.12 | 0.029 | 26.65 | 1.51  | 0.352 |
| CLL074 | 23.08 | 3.21 | 0.108 | 23.08 | 0.59  | 0.665 |
| CLL075 | 21.16 | 7.85 | 0.004 | 21.16 | 1.46  | 0.364 |
| CLL076 | 24.41 | 4.39 | 0.048 | 24.41 | 2.11  | 0.232 |
| CLL077 | 23.32 | 6.61 | 0.01  | 23.32 | 0.99  | 0.502 |
| CLL078 | 26.19 | 5.56 | 0.021 | 26.19 | 0.66  | 0.633 |
| CLL079 | 24.51 | 3.89 | 0.067 | 24.51 | 1.92  | 0.263 |
| CLL080 | 21.27 | 5.09 | 0.029 | 21.27 | 2.18  | 0.221 |
| CLL081 | 23.33 | 2.09 | 0.235 | 23.33 | 0.95  | 0.516 |
| CLL082 | 24.74 | 5.34 | 0.025 | 24.74 | 0.48  | 0.716 |
| CLL083 | 23.74 | 7.88 | 0.004 | 23.74 | 1.05  | 0.483 |
| CLL084 | 25.3  | 2.35 | 0.197 | 25.3  | 0.61  | 0.656 |
| CLL085 | 26.22 | 6.18 | 0.014 | 26.22 | 3     | 0.125 |
| CLL086 | 27.84 | 4.56 | 0.042 | 27.84 | 1.64  | 0.32  |
| CLL087 | 24.73 | 5.24 | 0.026 | 24.73 | 2.6   | 0.165 |
| CLL088 | 26.5  | 5.73 | 0.019 | 26.5  | 1.88  | 0.271 |

Supplemental data – Ferrajoli, Shanafelt, Ivan et al

|        |       |      |       |       |      |       |
|--------|-------|------|-------|-------|------|-------|
| CLL089 | 24.16 | 7.13 | 0.007 | 24.16 | 1.93 | 0.263 |
| CLL090 | 25.03 | 5.78 | 0.018 | 25.03 | 2.01 | 0.248 |
| CLL091 | 25.26 | 5.49 | 0.022 | 25.26 | 2.28 | 0.206 |
| CLL092 | 25.61 | 5.24 | 0.026 | 25.61 | 1.84 | 0.279 |
| CLL093 | 24.32 | 5.22 | 0.027 | 24.32 | 1.2  | 0.434 |
| CLL094 | 25.12 | 2.31 | 0.201 | 25.12 | 1.13 | 0.458 |
| CLL095 | 25.39 | 3.15 | 0.113 | 25.39 | 1.87 | 0.274 |
| CLL096 | 24.78 | 6.09 | 0.015 | 24.78 | 2.14 | 0.226 |
| CLL097 | 23.45 | 4.63 | 0.04  | 23.45 | 1.8  | 0.287 |
| CLL098 | 25.79 | 4.37 | 0.048 | 25.79 | 2.21 | 0.217 |
| CLL099 | 26.76 | 3.71 | 0.076 | 26.76 | 1.33 | 0.398 |
| CLL100 | 27.43 | 2.8  | 0.143 | 27.43 | 2.45 | 0.183 |
| CLL101 | 26.86 | 5.48 | 0.022 | 26.86 | 1.84 | 0.279 |
| CLL102 | 27.4  | 5.76 | 0.019 | 27.4  | 1.41 | 0.377 |
| CLL103 | 27.28 | 4.41 | 0.047 | 27.28 | 2.14 | 0.226 |
| CLL104 | 25.2  | 4.56 | 0.042 | 25.2  | 2.33 | 0.199 |
| CLL105 | 27.14 | 5    | 0.031 | 27.14 | 1.97 | 0.254 |
| CLL106 | 24.6  | 7.72 | 0.005 | 24.6  | 2.66 | 0.159 |
| CLL107 | 26.33 | 5.9  | 0.017 | 26.33 | 2.67 | 0.157 |
| CLL108 | 26.62 | 5.75 | 0.019 | 26.62 | 1.74 | 0.299 |
| CLL109 | 25.69 | 2.57 | 0.169 | 25.69 | 2.67 | 0.157 |
| CLL110 | 25.61 | 1.02 | 0.492 | 25.61 | 1.27 | 0.413 |
| CLL111 | 25.1  | 5.45 | 0.023 | 25.1  | 2.71 | 0.153 |
| CLL112 | 24.43 | 3.37 | 0.097 | 24.43 | 2.2  | 0.218 |
| CLL113 | 25.82 | 3.4  | 0.095 | 25.82 | 1.03 | 0.488 |
| CLL114 | 26.21 | 6.33 | 0.012 | 26.21 | 1.95 | 0.258 |
| CLL115 | 24.33 | 5.05 | 0.03  | 24.33 | 2.7  | 0.154 |
| CLL116 | 26.54 | 5.78 | 0.018 | 26.54 | 2.01 | 0.248 |
| CLL117 | 22.73 | 3.85 | 0.07  | 22.73 | 1.1  | 0.468 |
| CLL118 | 26.52 | 4.25 | 0.052 | 26.52 | 1.8  | 0.287 |
| CLL119 | 24.37 | 5.52 | 0.022 | 24.37 | 1.53 | 0.347 |

Supplemental data – Ferrajoli, Shanafelt, Ivan et al

|        |       |      |       |       |      |       |
|--------|-------|------|-------|-------|------|-------|
| CLL120 | 24.12 | 5.37 | 0.024 | 24.12 | 1.89 | 0.269 |
| CLL121 | 25.19 | 5.15 | 0.028 | 25.19 | 1.23 | 0.426 |
| CLL122 | 25.24 | 5.62 | 0.02  | 25.24 | 1.52 | 0.349 |
| CLL123 | 24.97 | 2.22 | 0.214 | 24.97 | 2.25 | 0.21  |
| CLL124 | 23.73 | 3.42 | 0.093 | 23.73 | 1.54 | 0.345 |
| CLL125 | 24.45 | 7.33 | 0.006 | 24.45 | 2.93 | 0.131 |
| CLL126 | 28.41 | 2.64 | 0.161 | 28.41 | 2.15 | 0.225 |
| CLL127 | 26.6  | 4.18 | 0.055 | 26.6  | 2.92 | 0.132 |
| CLL128 | 24.79 | 5.21 | 0.027 | 24.79 | 2.67 | 0.157 |
| CLL129 | 23.26 | 4.4  | 0.047 | 23.26 | 1.52 | 0.348 |
| CLL130 | 25.58 | 2.58 | 0.167 | 25.58 | 2.45 | 0.183 |
| CLL131 | 21.58 | 3.64 | 0.08  | 21.58 | 2.25 | 0.21  |
| CLL132 | 23.35 | 3.94 | 0.065 | 23.35 | 1.51 | 0.352 |
| CLL133 | 24.14 | 3.85 | 0.07  | 24.14 | 1.96 | 0.256 |
| CLL134 | 19.57 | 5.57 | 0.021 | 19.57 | 4.56 | 0.042 |
| CLL135 | 23.25 | 4.4  | 0.047 | 23.25 | 1.89 | 0.269 |
| CLL136 | 27.88 | 0.5  | 0.709 | 27.88 | 0.26 | 0.833 |
| CLL137 | 25.9  | 4.57 | 0.042 | 25.9  | 2.81 | 0.143 |
| CLL138 | 24.09 | 6.05 | 0.015 | 24.09 | 2.6  | 0.165 |
| CLL139 | 26.92 | 1.01 | 0.498 | 26.92 | 2.29 | 0.205 |
| CLL140 | 24.8  | 5.7  | 0.019 | 24.8  | 2.67 | 0.158 |
| CLL141 | 24.53 | 3.56 | 0.085 | 24.53 | 1.81 | 0.285 |
| CLL142 | 24.19 | 2.51 | 0.175 | 24.19 | 1.86 | 0.276 |
| CLL143 | 22.41 | 4.11 | 0.058 | 22.41 | 3.16 | 0.112 |
| CLL144 | 25.48 | 5.28 | 0.026 | ND    | ND   | ND    |
| CLL145 | 22.67 | 3.37 | 0.097 | ND    | ND   | ND    |
| CLL146 | 23.55 | 3.41 | 0.094 | ND    | ND   | ND    |
| CLL147 | 25.12 | 4.48 | 0.045 | ND    | ND   | ND    |
| CLL148 | 23.47 | 4.81 | 0.036 | ND    | ND   | ND    |
| CLL149 | 21.65 | 6.39 | 0.012 | ND    | ND   | ND    |
| CLL150 | 25.33 | 4.73 | 0.038 | ND    | ND   | ND    |

Supplemental data – Ferrajoli, Shanafelt, Ivan et al

|        |       |       |       |       |       |       |
|--------|-------|-------|-------|-------|-------|-------|
| CLL151 | 24.11 | 5.86  | 0.017 | ND    | ND    | ND    |
| CLL152 | 23.86 | 4.44  | 0.046 | ND    | ND    | ND    |
| CLL153 | 25.99 | 4.69  | 0.039 | ND    | ND    | ND    |
| CLL154 | 24.55 | 5.46  | 0.023 | ND    | ND    | ND    |
| CLL155 | 24.51 | 6.84  | 0.009 | ND    | ND    | ND    |
| CLL156 | 25.04 | 5     | 0.031 | ND    | ND    | ND    |
| CLL157 | 24.91 | 3.92  | 0.066 | ND    | ND    | ND    |
| CLL158 | 24.21 | 2.25  | 0.21  | ND    | ND    | ND    |
| CLL159 | 24.47 | 6.67  | 0.01  | ND    | ND    | ND    |
| CLL160 | 24.07 | 1.19  | 0.44  | ND    | ND    | ND    |
| CLL161 | 22.84 | 3.12  | 0.115 | ND    | ND    | ND    |
| CLL162 | 22.18 | 3.07  | 0.119 | ND    | ND    | ND    |
| CLL163 | 20.74 | 4.25  | 0.053 | ND    | ND    | ND    |
| CLL164 | 24.42 | 3.67  | 0.079 | ND    | ND    | ND    |
| CLL165 | 27.84 | 1.82  | 0.284 | ND    | ND    | ND    |
| CLL166 | 24.88 | 4.66  | 0.04  | ND    | ND    | ND    |
| CLL167 | 22.73 | 3.44  | 0.092 | ND    | ND    | ND    |
| CLL168 | 24.84 | 3.85  | 0.069 | ND    | ND    | ND    |
| CLL169 | 25.43 | 4.39  | 0.048 | ND    | ND    | ND    |
| CLL170 | 24.82 | 3.97  | 0.064 | ND    | ND    | ND    |
| CLL171 | 22.66 | 4.35  | 0.049 | ND    | ND    | ND    |
| CLL172 | 24.92 | 4.67  | 0.039 | ND    | ND    | ND    |
| CLL173 | 26.84 | 5.31  | 0.025 | ND    | ND    | ND    |
| CLL174 | 25.03 | 5.15  | 0.028 | ND    | ND    | ND    |
| CLL175 | 24.54 | 4.2   | 0.054 | 24.54 | 0.79  | 0.578 |
| CLL176 | 26.71 | 4.15  | 0.056 | 26.71 | 0.73  | 0.605 |
| CLL177 | 24.91 | 0.82  | 0.566 | 24.91 | -0.52 | 1.434 |
| CLL178 | 21.99 | 0.18  | 0.883 | 21.99 | 1.92  | 0.265 |
| CLL179 | 24.62 | -0.48 | 1.4   | 24.62 | 0.53  | 0.694 |
| CLL180 | 27.15 | -0.23 | 1.173 | 27.15 | -1    | 1.997 |
| CLL181 | 24.21 | 3.03  | 0.123 | 24.21 | 0.75  | 0.593 |

Supplemental data – Ferrajoli, Shanafelt, Ivan et al

|        |        |       |       |        |        |       |
|--------|--------|-------|-------|--------|--------|-------|
| CLL182 | 24.08  | 4.09  | 0.059 | 24.08  | 0.7    | 0.615 |
| CLL183 | 24.87  | 2.56  | 0.17  | 24.87  | 1.9    | 0.267 |
| CLL184 | 24.38  | -0.68 | 1.6   | 24.38  | 0.73   | 0.602 |
| CLL185 | 24.46  | -0.64 | 1.557 | 24.46  | -1.06  | 2.085 |
| CLL186 | 22.86  | -0.08 | 1.055 | 22.86  | 0.41   | 0.751 |
| CLL187 | 21.64  | 2.36  | 0.195 | 21.64  | 1.93   | 0.262 |
| CLL188 | 24.18  | 0.53  | 0.692 | 24.18  | 0.46   | 0.728 |
| CLL189 | 27.43  | 3.29  | 0.102 | 27.43  | -0.05  | 1.036 |
| CLL190 | 25.57  | 0.53  | 0.691 | 25.57  | -0.28  | 1.218 |
| CLL191 | 24.85  | NA    | NA    | 24.85  | 1.65   | 0.319 |
| CLL192 | 25.93  | NA    | NA    | 25.93  | 2.15   | 0.226 |
| CLL193 | 25.84  | 1.36  | 0.39  | 25.84  | 0.5    | 0.709 |
| CLL194 | 20.4   | -2.01 | 4.018 | 20.4   | 0.22   | 0.859 |
| CLL195 | 23.27  | -0.84 | 1.794 | 23.27  | 0.43   | 0.743 |
| CLL196 | 20.51  | 6.22  | 0.013 | 20.51  | 3.69   | 0.078 |
| CLL197 | 24.96  | 3.43  | 0.093 | 24.96  | 0.26   | 0.837 |
| CLL198 | 26     | 0.31  | 0.806 | 26     | -0.62  | 1.538 |
| CLL199 | 26.4   | 1.35  | 0.391 | 26.4   | 0.81   | 0.571 |
| CLL200 | 27.09  | NA    | NA    | 27.09  | 2.81   | 0.142 |
| CLL201 | 25.1   | 4.02  | 0.062 | 25.1   | -0.69  | 1.615 |
| CLL202 | 25.806 | 6.424 | 0.012 | 25.806 | -0.817 | 1.762 |
| CLL203 | 26.094 | 5.674 | 0.02  | 26.094 | -0.653 | 1.572 |
| CLL204 | 27.701 | 5.546 | 0.021 | 27.701 | -1.029 | 2.041 |
| CLL205 | 25.416 | 7.621 | 0.005 | 25.416 | 0.119  | 0.921 |
| CLL206 | 24.123 | 6.096 | 0.015 | 24.123 | 1.079  | 0.473 |
| CLL207 | 27.233 | 6.229 | 0.013 | 27.233 | -0.318 | 1.246 |
| CLL208 | 26.795 | 7.369 | 0.006 | 26.795 | 0.415  | 0.75  |
| CLL209 | 26.603 | NA    | NA    | 26.603 | -0.044 | 1.031 |
| CLL210 | 25.63  | 6.82  | 0.009 | 25.63  | 1.098  | 0.467 |
| CLL211 | 26.382 | 6.181 | 0.014 | 26.382 | -0.334 | 1.26  |
| CLL212 | 26.585 | 7.851 | 0.004 | 26.585 | 0.745  | 0.597 |

Supplemental data – Ferrajoli, Shanafelt, Ivan et al

|               |        |       |       |        |        |       |
|---------------|--------|-------|-------|--------|--------|-------|
| <b>CLL213</b> | 26.078 | 6.324 | 0.012 | 26.078 | 0.747  | 0.596 |
| <b>CLL214</b> | 28.077 | NA    | NA    | 28.077 | 0.827  | 0.564 |
| <b>CLL215</b> | 26.298 | 4.196 | 0.055 | 26.298 | -2.353 | 5.108 |
| <b>CLL216</b> | 25.873 | 6.886 | 0.008 | 25.873 | 0.135  | 0.911 |
| <b>CLL217</b> | 25.202 | 5.804 | 0.018 | 25.202 | -0.928 | 1.903 |
| <b>CLL218</b> | 25.042 | 7.036 | 0.008 | 25.042 | 0.5    | 0.707 |
| <b>CLL219</b> | 27.203 | 5.262 | 0.026 | 27.203 | -1.691 | 3.228 |
| <b>CLL220</b> | 29.317 | 5.689 | 0.019 | 29.317 | -1.3   | 2.463 |
| <b>CLL221</b> | 26.51  | 5.737 | 0.019 | 26.51  | -0.875 | 1.834 |
| <b>CLL222</b> | 25.377 | 6.308 | 0.013 | 25.377 | 0.993  | 0.503 |
| <b>CLL223</b> | 28.098 | 6.921 | 0.008 | 28.098 | -0.838 | 1.788 |
| <b>CLL224</b> | 25.33  | 7.63  | 0.005 | 25.33  | 0.941  | 0.521 |
| <b>CLL225</b> | 26.336 | 6.589 | 0.01  | 26.336 | 0.779  | 0.583 |
| <b>CLL226</b> | 28.395 | NA    | NA    | 28.395 | -0.919 | 1.891 |
| <b>CLL227</b> | 25.4   | NA    | NA    | 25.4   | 1.294  | 0.408 |
| <b>CLL228</b> | 26.367 | 4.997 | 0.031 | 26.367 | 0.299  | 0.813 |

ND = not done; NA = not available. When expression values for the endogenous control or for a specific miRNA were not obtained after 35 cycles of amplification in 2 successive experiments in duplicate wells, the specific values were considered to be unavailable.
